# Supplementary material for: Illustrating the Assumptions of Meta-Regression in Treatment Networks
Source: Research Square preprint supplement (doi:10.21203/rs.3.rs-8235913/v1), 2026-02-24
Supplement: Supplementary file 2 [file 5cecfeb23949e7e358da986f.xlsx]

## Sheet: TOC
Table	Sheet name	model type	covariate
Table 4	NMA_results	NMA	N/A
Table 5	NMR_ind_year	Independent Consistency	Study Year as Covariate
Table 6	NMR_ind_SE	Independent Consistency	Standard Error as Covariate
Table 7	NMR_ind_sponsorship	Independent Consistency	Hypothetical Study Sponsorship as Covariate
Table 8	NMR_common_year	Common Consistency	Study Year as Covariate
Table 9	NMR_common_SE	Common Consistency	Standard Error as Covariate
Table 10	NMR_common_sponsorship	Common Consistency	Hypothetical Study Sponsorship as Covariate
Table 11	NMR_CUMIE_year_sponsorship	Common UMIE	Study Year as Covariate
Table 12	NMR_CUMIE_SE_sponsorship	Common UMIE	Standard Error as Covariate
Table 13	NMR_IUMIE_year_sponsorship	Independent UMIE	Study Year as Covariate and Hypothetical Treatment Sponsorship as Direction
Table 14	NMR_IUMIE_SE_sponsorship	Independent UMIE	Standard Error as Covariate and Hypothetical Treatment Sponsorship as Direction
Table 15	NMR_IUMIE_year	Independent UMIE	Study Year as Covariate and Treatment Order as Direction
Table 16	NMR_IUMIE_SE	Independent UMIE	Standard Error as Covariate and Treatment Order as Direction
Table 17	NMR_IUMIE_sponsorship	Independent UMIE	Hypothetical Study Sponsorship as Covariate and Treatment Order as Direction

## Sheet: NMA_results
Comparator	Reference	Parameter Type	Estimate (Confidence Interval)	Estimate (Credible Interval)	Rhat	Table of contents
acarbose	placebo	Treatment Effect	-0.841 (-1.309 to -0.374)	-0.841 (-1.351 to -0.331)	1.000
benfluorex	placebo	Treatment Effect	-0.737 (-1.281 to -0.193)	-0.729 (-1.311 to -0.118)	1.000
metformin	placebo	Treatment Effect	-1.128 (-1.421 to -0.836)	-1.124 (-1.438 to -0.802)	1.000
miglitol	placebo	Treatment Effect	-0.95 (-1.391 to -0.508)	-0.95 (-1.429 to -0.473)	1.000
pioglitazone	placebo	Treatment Effect	-1.129 (-1.545 to -0.714)	-1.128 (-1.586 to -0.668)	1.000
placebo	placebo	Treatment Effect	0 (0 to 0)	0 (0 to 0)
rosiglitazone	placebo	Treatment Effect	-1.234 (-1.476 to -0.992)	-1.233 (-1.5 to -0.966)	1.000
sitagliptin	placebo	Treatment Effect	-0.57 (-1.239 to 0.099)	-0.567 (-1.312 to 0.175)	1.000
sulfonylurea	placebo	Treatment Effect	-0.418 (-0.873 to 0.038)	-0.415 (-0.919 to 0.09)	1.000
vildagliptin	placebo	Treatment Effect	-0.7 (-1.368 to -0.032)	-0.702 (-1.445 to 0.036)	1.000

## Sheet: NMR_ind_year
Comparator	Reference	Parameter Type	Estimate (Confidence Interval)	Estimate (Credible Interval)	Rhat	Table of contents
acarbose	placebo	Adjusted Treatment Effect	-1.497 (-2.399 to -0.596)	-0.939 (-1.452 to -0.429)	1.000
acarbose	placebo	Interaction	0.169 (-0.01 to 0.349)	-0.646 (-195.999 to 194.676)	1.000
benfluorex	acarbose	Adjusted Treatment Effect	1.423 (0.06 to 2.787)	0.708 (-0.376 to 1.796)	1
benfluorex	acarbose	Interaction	-0.247 (-0.454 to -0.041)	0.568 (-194.755 to 195.901)	1
benfluorex	placebo	Adjusted Treatment Effect	-0.074 (-1.097 to 0.949)	-0.231 (-1.191 to 0.732)	1.000
benfluorex	placebo	Interaction	-0.078 (-0.18 to 0.024)	-0.078 (-0.2 to 0.042)	1.000
metformin	acarbose	Adjusted Treatment Effect	-0.22 (-1.174 to 0.733)	-0.408 (-0.945 to 0.144)	1.000
metformin	acarbose	Interaction	-0.1 (-0.279 to 0.079)	0.697 (-194.644 to 196.034)	1
metformin	benfluorex	Adjusted Treatment Effect	-1.644 (-2.801 to -0.487)	-1.116 (-2.148 to -0.077)	1.000
metformin	benfluorex	Interaction	0.147 (0.03 to 0.265)	0.129 (-0.006 to 0.265)	1
metformin	placebo	Adjusted Treatment Effect	-1.718 (-2.259 to -1.177)	-1.347 (-1.75 to -0.937)	1.000
metformin	placebo	Interaction	0.069 (0.012 to 0.127)	0.051 (-0.012 to 0.114)	1.001
miglitol	acarbose	Adjusted Treatment Effect	0.757 (-0.337 to 1.852)	0.199 (-0.724 to 1.12)	1
miglitol	acarbose	Interaction	-0.256 (-0.524 to 0.012)	0.562 (-194.69 to 195.855)	1
miglitol	benfluorex	Adjusted Treatment Effect	-0.666 (-1.863 to 0.531)	-0.509 (-1.747 to 0.721)	1.000
miglitol	benfluorex	Interaction	-0.009 (-0.233 to 0.215)	-0.006 (-0.277 to 0.267)	1.000
miglitol	metformin	Adjusted Treatment Effect	0.978 (0.154 to 1.802)	0.606 (-0.271 to 1.467)	1
miglitol	metformin	Interaction	-0.156 (-0.363 to 0.051)	-0.135 (-0.385 to 0.117)	1.000
miglitol	placebo	Adjusted Treatment Effect	-0.74 (-1.361 to -0.119)	-0.74 (-1.518 to 0.03)	1.000
miglitol	placebo	Interaction	-0.087 (-0.286 to 0.113)	-0.084 (-0.329 to 0.161)	1.000
pioglitazone	acarbose	Adjusted Treatment Effect	-0.633 (-2.972 to 1.706)	-0.321 (-0.965 to 0.333)	1.000
pioglitazone	acarbose	Interaction	-0.051 (-0.349 to 0.247)	0.762 (-275.824 to 277.204)	1
pioglitazone	benfluorex	Adjusted Treatment Effect	-2.057 (-4.448 to 0.335)	-1.029 (-2.1 to 0.043)	1.000
pioglitazone	benfluorex	Interaction	0.197 (-0.066 to 0.46)	0.194 (-195.357 to 198.095)	1
pioglitazone	metformin	Adjusted Treatment Effect	-0.413 (-2.658 to 1.832)	0.087 (-0.402 to 0.566)	1
pioglitazone	metformin	Interaction	0.049 (-0.194 to 0.293)	0.065 (-195.565 to 198.004)	1
pioglitazone	miglitol	Adjusted Treatment Effect	-1.391 (-3.64 to 0.859)	-0.519 (-1.427 to 0.391)	1.000
pioglitazone	miglitol	Interaction	0.205 (-0.108 to 0.519)	0.2 (-195.392 to 198.091)	1
pioglitazone	placebo	Adjusted Treatment Effect	-2.131 (-4.293 to 0.031)	-1.26 (-1.739 to -0.772)	1.000
pioglitazone	placebo	Interaction	0.119 (-0.123 to 0.361)	0.116 (-195.467 to 198.044)	1
rosiglitazone	acarbose	Adjusted Treatment Effect	0.23 (-1.072 to 1.531)	-0.467 (-1.048 to 0.119)	1.000
rosiglitazone	acarbose	Interaction	-0.158 (-0.366 to 0.05)	0.681 (-194.648 to 196.054)	1
rosiglitazone	benfluorex	Adjusted Treatment Effect	-1.194 (-2.497 to 0.11)	-1.175 (-2.225 to -0.128)	1.000
rosiglitazone	benfluorex	Interaction	0.09 (-0.039 to 0.218)	0.113 (-0.033 to 0.259)	1
rosiglitazone	metformin	Adjusted Treatment Effect	0.45 (-0.478 to 1.378)	-0.06 (-0.503 to 0.372)	1.001
rosiglitazone	metformin	Interaction	-0.058 (-0.148 to 0.032)	-0.016 (-0.11 to 0.08)	1.001
rosiglitazone	miglitol	Adjusted Treatment Effect	-0.528 (-1.547 to 0.491)	-0.666 (-1.544 to 0.215)	1.000
rosiglitazone	miglitol	Interaction	0.098 (-0.116 to 0.312)	0.119 (-0.141 to 0.375)	1
rosiglitazone	pioglitazone	Adjusted Treatment Effect	0.863 (-1.465 to 3.191)	-0.146 (-0.651 to 0.355)	1.000
rosiglitazone	pioglitazone	Interaction	-0.107 (-0.36 to 0.146)	-0.081 (-198.02 to 195.532)	1.000
rosiglitazone	placebo	Adjusted Treatment Effect	-1.268 (-2.075 to -0.46)	-1.406 (-1.836 to -0.977)	1.000
rosiglitazone	placebo	Interaction	0.012 (-0.066 to 0.089)	0.035 (-0.047 to 0.117)	1
sitagliptin	acarbose	Adjusted Treatment Effect	0.927 (-0.137 to 1.991)	0.37 (-0.517 to 1.257)	1
sitagliptin	benfluorex	Adjusted Treatment Effect	-0.496 (-1.665 to 0.673)	-0.338 (-1.541 to 0.866)	1.000
sitagliptin	metformin	Adjusted Treatment Effect	1.148 (0.365 to 1.931)	0.777 (-0.061 to 1.605)	1
sitagliptin	miglitol	Adjusted Treatment Effect	0.17 (-0.67 to 1.01)	0.171 (-0.888 to 1.24)	1
sitagliptin	pioglitazone	Adjusted Treatment Effect	1.561 (-0.674 to 3.795)	0.69 (-0.18 to 1.561)	1
sitagliptin	placebo	Adjusted Treatment Effect	-0.57 (-1.136 to -0.004)	-0.569 (-1.293 to 0.159)	1.000
sitagliptin	rosiglitazone	Adjusted Treatment Effect	0.698 (-0.288 to 1.684)	0.837 (-0.004 to 1.679)	1
sulfonylurea	acarbose	Adjusted Treatment Effect	-0.447 (-1.582 to 0.688)	0.357 (-0.186 to 0.919)	1
sulfonylurea	acarbose	Interaction	0.064 (-0.035 to 0.162)	0.799 (-276.113 to 276.92)	1
sulfonylurea	benfluorex	Adjusted Treatment Effect	-1.87 (-3.576 to -0.164)	-0.351 (-1.446 to 0.75)	1.000
sulfonylurea	benfluorex	Interaction	0.311 (0.077 to 0.545)	0.231 (-195.562 to 196.469)	1
sulfonylurea	metformin	Adjusted Treatment Effect	-0.227 (-1.468 to 1.015)	0.765 (0.264 to 1.261)	1
sulfonylurea	metformin	Interaction	0.164 (-0.04 to 0.368)	0.102 (-195.709 to 196.293)	1
sulfonylurea	miglitol	Adjusted Treatment Effect	-1.204 (-2.704 to 0.296)	0.159 (-0.774 to 1.098)	1
sulfonylurea	miglitol	Interaction	0.32 (0.03 to 0.609)	0.238 (-195.509 to 196.511)	1
sulfonylurea	pioglitazone	Adjusted Treatment Effect	0.186 (-2.396 to 2.768)	0.678 (0.053 to 1.305)	1
sulfonylurea	pioglitazone	Interaction	0.114 (-0.206 to 0.434)	0.037 (-277.225 to 276.443)	1
sulfonylurea	placebo	Adjusted Treatment Effect	-1.944 (-3.31 to -0.579)	-0.582 (-1.12 to -0.037)	1.000
sulfonylurea	placebo	Interaction	0.233 (0.023 to 0.443)	0.153 (-195.66 to 196.385)	1
sulfonylurea	rosiglitazone	Adjusted Treatment Effect	-0.677 (-2.325 to 0.972)	0.824 (0.311 to 1.35)	1
sulfonylurea	rosiglitazone	Interaction	0.221 (-0.013 to 0.456)	0.118 (-195.732 to 196.366)	1
sulfonylurea	sitagliptin	Adjusted Treatment Effect	-1.374 (-2.852 to 0.103)	-0.012 (-0.912 to 0.895)	1.000
vildagliptin	acarbose	Adjusted Treatment Effect	0.797 (-0.266 to 1.861)	0.238 (-0.649 to 1.125)	1
vildagliptin	benfluorex	Adjusted Treatment Effect	-0.626 (-1.794 to 0.542)	-0.47 (-1.677 to 0.729)	1.000
vildagliptin	metformin	Adjusted Treatment Effect	1.018 (0.236 to 1.8)	0.646 (-0.195 to 1.47)	1
vildagliptin	miglitol	Adjusted Treatment Effect	0.04 (-0.799 to 0.879)	0.04 (-1.022 to 1.109)	1
vildagliptin	pioglitazone	Adjusted Treatment Effect	1.431 (-0.804 to 3.665)	0.559 (-0.319 to 1.433)	1
vildagliptin	placebo	Adjusted Treatment Effect	-0.7 (-1.264 to -0.136)	-0.701 (-1.431 to 0.031)	1.000
vildagliptin	rosiglitazone	Adjusted Treatment Effect	0.568 (-0.417 to 1.553)	0.705 (-0.133 to 1.545)	1
vildagliptin	sitagliptin	Adjusted Treatment Effect	-0.13 (-0.929 to 0.669)	-0.131 (-1.167 to 0.897)	1.000
vildagliptin	sulfonylurea	Adjusted Treatment Effect	1.244 (-0.233 to 2.722)	-0.119 (-1.02 to 0.779)	1.000
sitagliptin	placebo	Interaction	0 (0 to 0)	-0.049 (-197.316 to 195.913)	1.000
vildagliptin	placebo	Interaction	0 (0 to 0)	-0.068 (-193.226 to 194.16)	1.000
sitagliptin	acarbose	Interaction	0 (0 to 0)	0.597 (-274.748 to 275.84)	1
vildagliptin	acarbose	Interaction	0 (0 to 0)	0.578 (-275.367 to 275.899)	1
sitagliptin	benfluorex	Interaction	0 (0 to 0)	0.029 (-197.27 to 195.936)	1
vildagliptin	benfluorex	Interaction	0 (0 to 0)	0.01 (-193.185 to 194.24)	1
sitagliptin	metformin	Interaction	0 (0 to 0)	-0.1 (-197.352 to 195.848)	1.000
vildagliptin	metformin	Interaction	0 (0 to 0)	-0.119 (-193.285 to 194.131)	1.000
sitagliptin	miglitol	Interaction	0 (0 to 0)	0.035 (-197.275 to 195.996)	1
vildagliptin	miglitol	Interaction	0 (0 to 0)	0.016 (-193.12 to 194.313)	1
sitagliptin	pioglitazone	Interaction	0 (0 to 0)	-0.165 (-278.202 to 276.501)	1.000
vildagliptin	pioglitazone	Interaction	0 (0 to 0)	-0.184 (-277.286 to 274.73)	1.000
sitagliptin	rosiglitazone	Interaction	0 (0 to 0)	-0.084 (-197.364 to 195.88)	1.000
vildagliptin	rosiglitazone	Interaction	0 (0 to 0)	-0.103 (-193.256 to 194.144)	1.000
sulfonylurea	sitagliptin	Interaction	0 (0 to 0)	0.203 (-278.682 to 278.331)	1
vildagliptin	sitagliptin	Interaction	0 (0 to 0)	-0.019 (-276.747 to 277.845)	1.000
vildagliptin	sulfonylurea	Interaction	0 (0 to 0)	-0.221 (-274.601 to 277.13)	1.000

## Sheet: NMR_ind_SE
Comparator	Reference	Parameter Type	Estimate (Confidence Interval)	Estimate (Credible Interval)	Rhat	Table of contents
acarbose	placebo	Adjusted Treatment Effect	-0.53 (-1.602 to 0.542)	-0.939 (-1.893 to 0.044)	1.032
acarbose	placebo	Interaction	-0.623 (-4.413 to 3.168)	0.069 (-4.813 to 4.978)	1.005
benfluorex	acarbose	Adjusted Treatment Effect	-0.988 (-2.741 to 0.766)	-0.464 (-2.184 to 1.222)	1.013
benfluorex	acarbose	Interaction	4.336 (-2.633 to 11.305)	4.736 (-5.013 to 14.641)	1.003
benfluorex	placebo	Adjusted Treatment Effect	-1.517 (-2.905 to -0.13)	-1.402 (-2.812 to -0.012)	1.001
benfluorex	placebo	Interaction	3.713 (-2.135 to 9.562)	4.805 (-3.583 to 13.275)	1.001
metformin	acarbose	Adjusted Treatment Effect	-0.968 (-2.251 to 0.316)	-0.388 (-1.58 to 0.73)	1.017
metformin	acarbose	Interaction	2.088 (-2.115 to 6.291)	1.644 (-4.721 to 8.405)	1.005
metformin	benfluorex	Adjusted Treatment Effect	0.02 (-1.549 to 1.589)	0.076 (-1.534 to 1.658)	1.001
metformin	benfluorex	Interaction	-2.249 (-8.849 to 4.351)	-3.091 (-12.856 to 6.922)	1.000
metformin	placebo	Adjusted Treatment Effect	-1.497 (-2.229 to -0.766)	-1.327 (-2.124 to -0.605)	1.001
metformin	placebo	Interaction	1.465 (-1.594 to 4.524)	1.714 (-3.101 to 6.982)	1.001
miglitol	acarbose	Adjusted Treatment Effect	-0.635 (-3.59 to 2.319)	-0.842 (-3.016 to 1.371)	1.001
miglitol	acarbose	Interaction	1.578 (-11.007 to 14.163)	5.879 (-8.69 to 20.019)	1.002
miglitol	benfluorex	Adjusted Treatment Effect	0.352 (-2.731 to 3.435)	-0.378 (-2.793 to 2.055)	1.005
miglitol	benfluorex	Interaction	-2.758 (-16.108 to 10.591)	1.144 (-14.796 to 16.992)	1.006
miglitol	metformin	Adjusted Treatment Effect	0.332 (-2.516 to 3.181)	-0.453 (-2.49 to 1.694)	1.004
miglitol	metformin	Interaction	-0.51 (-12.894 to 11.874)	4.235 (-10.382 to 18.096)	1.005
miglitol	placebo	Adjusted Treatment Effect	-1.165 (-3.918 to 1.588)	-1.78 (-3.723 to 0.212)	1.005
miglitol	placebo	Interaction	0.955 (-11.045 to 12.955)	5.949 (-7.575 to 19.285)	1.005
pioglitazone	acarbose	Adjusted Treatment Effect	-0.783 (-2.797 to 1.232)	-0.164 (-2.253 to 1.777)	1.022
pioglitazone	acarbose	Interaction	1.315 (-11.335 to 13.965)	-0.55 (-17.538 to 18.352)	1.010
pioglitazone	benfluorex	Adjusted Treatment Effect	0.205 (-1.982 to 2.393)	0.3 (-2.128 to 2.507)	1.002
pioglitazone	benfluorex	Interaction	-3.021 (-16.532 to 10.49)	-5.286 (-23.35 to 15.252)	1.004
pioglitazone	metformin	Adjusted Treatment Effect	0.185 (-1.309 to 1.679)	0.224 (-1.489 to 1.788)	1.008
pioglitazone	metformin	Interaction	-0.773 (-12.316 to 10.771)	-2.194 (-17.646 to 15.197)	1.007
pioglitazone	miglitol	Adjusted Treatment Effect	-0.147 (-3.378 to 3.084)	0.678 (-2.119 to 3.276)	1.01
pioglitazone	miglitol	Interaction	-0.263 (-17.361 to 16.836)	-6.429 (-27.444 to 16.757)	1.012
pioglitazone	placebo	Adjusted Treatment Effect	-1.312 (-3.003 to 0.379)	-1.102 (-3.056 to 0.578)	1.005
pioglitazone	placebo	Interaction	0.692 (-11.487 to 12.872)	-0.481 (-16.211 to 18.056)	1.007
rosiglitazone	acarbose	Adjusted Treatment Effect	-0.59 (-1.915 to 0.735)	-0.357 (-1.791 to 1.017)	1.105
rosiglitazone	acarbose	Interaction	-0.086 (-6.476 to 6.304)	0.732 (-8.853 to 10.708)	1.069
rosiglitazone	benfluorex	Adjusted Treatment Effect	0.398 (-1.256 to 2.052)	0.107 (-1.62 to 1.789)	1.017
rosiglitazone	benfluorex	Interaction	-4.422 (-12.529 to 3.685)	-4.004 (-15.821 to 8.132)	1.025
rosiglitazone	metformin	Adjusted Treatment Effect	0.378 (-0.824 to 1.58)	0.031 (-1.184 to 1.232)	1.052
rosiglitazone	metformin	Interaction	-2.174 (-8.323 to 3.975)	-0.912 (-9.595 to 8.109)	1.055
rosiglitazone	miglitol	Adjusted Treatment Effect	0.046 (-2.851 to 2.942)	0.485 (-1.787 to 2.667)	1.032
rosiglitazone	miglitol	Interaction	-1.664 (-14.913 to 11.585)	-5.147 (-21.03 to 11.386)	1.037
rosiglitazone	pioglitazone	Adjusted Treatment Effect	0.193 (-1.741 to 2.126)	-0.193 (-2.137 to 1.908)	1.005
rosiglitazone	pioglitazone	Interaction	-1.401 (-14.483 to 11.681)	1.282 (-17.597 to 18.701)	1.002
rosiglitazone	placebo	Adjusted Treatment Effect	-1.119 (-2.02 to -0.219)	-1.296 (-2.329 to -0.317)	1.071
rosiglitazone	placebo	Interaction	-0.709 (-6.323 to 4.905)	0.801 (-7.807 to 9.919)	1.063
sitagliptin	acarbose	Adjusted Treatment Effect	-0.04 (-1.345 to 1.264)	-0.213 (-18.833 to 17.797)	1.003
sitagliptin	benfluorex	Adjusted Treatment Effect	0.947 (-0.627 to 2.521)	0.251 (-18.393 to 18.537)	1.003
sitagliptin	metformin	Adjusted Treatment Effect	0.927 (-0.115 to 1.97)	0.175 (-18.459 to 18.25)	1.003
sitagliptin	miglitol	Adjusted Treatment Effect	0.595 (-2.257 to 3.447)	0.629 (-17.934 to 18.927)	1.003
sitagliptin	pioglitazone	Adjusted Treatment Effect	0.742 (-1.105 to 2.589)	-0.049 (-18.648 to 17.92)	1.005
sitagliptin	placebo	Adjusted Treatment Effect	-0.57 (-1.313 to 0.173)	-1.151 (-19.769 to 16.957)	1.003
sitagliptin	rosiglitazone	Adjusted Treatment Effect	0.549 (-0.618 to 1.717)	0.144 (-18.602 to 18.27)	1.003
sulfonylurea	acarbose	Adjusted Treatment Effect	-3.068 (-8.377 to 2.241)	2.695 (-3.728 to 7.676)	1.431
sulfonylurea	acarbose	Interaction	23.637 (-12.352 to 59.627)	-26.602 (-82.886 to 47.632)	1.438
sulfonylurea	benfluorex	Adjusted Treatment Effect	-2.08 (-7.11 to 2.949)	3.158 (-3.086 to 8.128)	1.405
sulfonylurea	benfluorex	Interaction	19.301 (-16.143 to 54.745)	-31.338 (-88.064 to 42.488)	1.430
sulfonylurea	metformin	Adjusted Treatment Effect	-2.101 (-6.685 to 2.484)	3.083 (-3.059 to 7.815)	1.44
sulfonylurea	metformin	Interaction	21.55 (-12.759 to 55.858)	-28.246 (-83.767 to 45.543)	1.441
sulfonylurea	miglitol	Adjusted Treatment Effect	-2.433 (-7.996 to 3.13)	3.536 (-2.817 to 8.693)	1.431
sulfonylurea	miglitol	Interaction	22.059 (-14.901 to 59.02)	-32.481 (-90.192 to 41.435)	1.450
sulfonylurea	pioglitazone	Adjusted Treatment Effect	-2.285 (-7.056 to 2.485)	2.858 (-3.293 to 7.862)	1.362
sulfonylurea	pioglitazone	Interaction	22.322 (-12.73 to 57.374)	-26.052 (-84.453 to 47.398)	1.379
sulfonylurea	placebo	Adjusted Treatment Effect	-3.598 (-8.432 to 1.236)	1.756 (-4.363 to 6.444)	1.441
sulfonylurea	placebo	Interaction	23.014 (-11.944 to 57.973)	-26.532 (-82.186 to 47.16)	1.443
sulfonylurea	rosiglitazone	Adjusted Treatment Effect	-2.478 (-7.499 to 2.543)	3.051 (-2.848 to 7.493)	1.405
sulfonylurea	rosiglitazone	Interaction	23.723 (-12.324 to 59.771)	-27.334 (-80.789 to 44.554)	1.416
sulfonylurea	sitagliptin	Adjusted Treatment Effect	-3.028 (-7.918 to 1.863)	2.907 (-16.754 to 22.438)	1.029
vildagliptin	acarbose	Adjusted Treatment Effect	-0.17 (-1.474 to 1.133)	0.077 (-19.941 to 18.74)	1.018
vildagliptin	benfluorex	Adjusted Treatment Effect	0.817 (-0.756 to 2.391)	0.54 (-19.516 to 19.262)	1.02
vildagliptin	metformin	Adjusted Treatment Effect	0.797 (-0.244 to 1.839)	0.465 (-19.446 to 19.17)	1.019
vildagliptin	miglitol	Adjusted Treatment Effect	0.465 (-2.386 to 3.316)	0.918 (-19.137 to 19.733)	1.018
vildagliptin	pioglitazone	Adjusted Treatment Effect	0.612 (-1.234 to 2.459)	0.24 (-19.676 to 19.09)	1.021
vildagliptin	placebo	Adjusted Treatment Effect	-0.7 (-1.442 to 0.042)	-0.862 (-20.855 to 17.835)	1.020
vildagliptin	rosiglitazone	Adjusted Treatment Effect	0.419 (-0.747 to 1.586)	0.433 (-19.699 to 19.275)	1.023
vildagliptin	sitagliptin	Adjusted Treatment Effect	-0.13 (-1.18 to 0.92)	0.289 (-28.511 to 26.779)	1.007
vildagliptin	sulfonylurea	Adjusted Treatment Effect	2.898 (-1.993 to 7.788)	-2.618 (-23.614 to 17.577)	1.090
sitagliptin	placebo	Interaction	0 (0 to 0)	6.347 (-192.044 to 210.058)	1.003
vildagliptin	placebo	Interaction	0 (0 to 0)	1.808 (-205.434 to 223.725)	1.02
sitagliptin	acarbose	Interaction	0 (0 to 0)	6.278 (-191.29 to 209.804)	1.003
vildagliptin	acarbose	Interaction	0 (0 to 0)	1.739 (-205.476 to 224.023)	1.02
sitagliptin	benfluorex	Interaction	0 (0 to 0)	1.542 (-197.38 to 205.112)	1.003
vildagliptin	benfluorex	Interaction	0 (0 to 0)	-2.997 (-210.081 to 219.04)	1.020
sitagliptin	metformin	Interaction	0 (0 to 0)	4.634 (-193.203 to 208.384)	1.003
vildagliptin	metformin	Interaction	0 (0 to 0)	0.094 (-207.138 to 221.699)	1.02
sitagliptin	miglitol	Interaction	0 (0 to 0)	0.399 (-198.375 to 203.562)	1.003
vildagliptin	miglitol	Interaction	0 (0 to 0)	-4.141 (-211.906 to 218.316)	1.019
sitagliptin	pioglitazone	Interaction	0 (0 to 0)	6.828 (-189.481 to 210.351)	1.005
vildagliptin	pioglitazone	Interaction	0 (0 to 0)	2.288 (-206.231 to 224.122)	1.021
sitagliptin	rosiglitazone	Interaction	0 (0 to 0)	5.546 (-192.563 to 210.378)	1.003
vildagliptin	rosiglitazone	Interaction	0 (0 to 0)	1.007 (-207.708 to 224.141)	1.023
sulfonylurea	sitagliptin	Interaction	0 (0 to 0)	-32.88 (-248.997 to 185.574)	1.035
vildagliptin	sitagliptin	Interaction	0 (0 to 0)	-4.539 (-297.195 to 312.989)	1.007
vildagliptin	sulfonylurea	Interaction	0 (0 to 0)	28.34 (-198.597 to 262.595)	1.098

## Sheet: NMR_ind_sponsorship
Comparator	Reference	Parameter Type	Estimate (Confidence Interval)	Estimate (Credible Interval)	Rhat	Table of contents
acarbose	placebo	Adjusted Treatment Effect	-0.881 (-1.332 to -0.43)	-0.881 (-1.399 to -0.363)	1.001
benfluorex	acarbose	Adjusted Treatment Effect	0.651 (-0.322 to 1.624)	0.657 (-0.41 to 1.743)	1
benfluorex	placebo	Adjusted Treatment Effect	-0.23 (-1.092 to 0.632)	-0.224 (-1.167 to 0.725)	1.000
benfluorex	placebo	Interaction	-0.78 (-1.827 to 0.267)	-0.787 (-1.965 to 0.386)	1.000
metformin	acarbose	Adjusted Treatment Effect	-0.139 (-0.61 to 0.333)	-0.136 (-0.681 to 0.41)	1.000
metformin	benfluorex	Adjusted Treatment Effect	-0.79 (-1.728 to 0.149)	-0.793 (-1.827 to 0.243)	1.000
metformin	benfluorex	Interaction	0.467 (-0.706 to 1.641)	0.479 (-0.826 to 1.829)	1
metformin	placebo	Adjusted Treatment Effect	-1.02 (-1.39 to -0.649)	-1.017 (-1.461 to -0.58)	1.000
metformin	placebo	Interaction	-0.313 (-0.843 to 0.217)	-0.308 (-0.919 to 0.35)	1.000
miglitol	acarbose	Adjusted Treatment Effect	0.166 (-0.502 to 0.833)	0.168 (-0.589 to 0.933)	1
miglitol	benfluorex	Adjusted Treatment Effect	-0.485 (-1.478 to 0.507)	-0.489 (-1.584 to 0.605)	1.000
miglitol	benfluorex	Interaction	0.085 (-1.26 to 1.431)	0.09 (-1.427 to 1.617)	1
miglitol	metformin	Adjusted Treatment Effect	0.304 (-0.312 to 0.92)	0.304 (-0.407 to 1.016)	1
miglitol	metformin	Interaction	-0.382 (-1.38 to 0.616)	-0.389 (-1.557 to 0.733)	1.000
miglitol	placebo	Adjusted Treatment Effect	-0.715 (-1.207 to -0.223)	-0.713 (-1.271 to -0.158)	1.000
miglitol	placebo	Interaction	-0.695 (-1.54 to 0.151)	-0.697 (-1.648 to 0.264)	1.000
pioglitazone	acarbose	Adjusted Treatment Effect	-0.175 (-0.733 to 0.383)	-0.167 (-0.816 to 0.483)	1.001
pioglitazone	benfluorex	Adjusted Treatment Effect	-0.826 (-1.775 to 0.123)	-0.824 (-1.89 to 0.227)	1.000
pioglitazone	metformin	Adjusted Treatment Effect	-0.036 (-0.458 to 0.385)	-0.031 (-0.534 to 0.476)	1.001
pioglitazone	miglitol	Adjusted Treatment Effect	-0.341 (-0.974 to 0.292)	-0.335 (-1.065 to 0.395)	1.000
pioglitazone	placebo	Adjusted Treatment Effect	-1.056 (-1.455 to -0.657)	-1.048 (-1.523 to -0.571)	1.000
rosiglitazone	acarbose	Adjusted Treatment Effect	-0.244 (-0.873 to 0.385)	-0.224 (-0.945 to 0.524)	1.003
rosiglitazone	benfluorex	Adjusted Treatment Effect	-0.895 (-1.874 to 0.084)	-0.881 (-1.978 to 0.232)	1.001
rosiglitazone	benfluorex	Interaction	0.661 (-0.511 to 1.834)	0.646 (-0.714 to 1.984)	1.001
rosiglitazone	metformin	Adjusted Treatment Effect	-0.105 (-0.652 to 0.442)	-0.088 (-0.718 to 0.569)	1.003
rosiglitazone	metformin	Interaction	0.194 (-0.469 to 0.857)	0.166 (-0.662 to 0.911)	1.002
rosiglitazone	miglitol	Adjusted Treatment Effect	-0.41 (-1.086 to 0.266)	-0.392 (-1.157 to 0.409)	1.001
rosiglitazone	miglitol	Interaction	0.576 (-0.421 to 1.573)	0.555 (-0.609 to 1.691)	1.001
rosiglitazone	pioglitazone	Adjusted Treatment Effect	-0.069 (-0.55 to 0.412)	-0.057 (-0.616 to 0.523)	1.001
rosiglitazone	placebo	Adjusted Treatment Effect	-1.125 (-1.589 to -0.662)	-1.105 (-1.646 to -0.534)	1.003
rosiglitazone	placebo	Interaction	-0.119 (-0.647 to 0.409)	-0.141 (-0.795 to 0.481)	1.002
sitagliptin	acarbose	Adjusted Treatment Effect	0.311 (-0.43 to 1.052)	0.311 (-0.554 to 1.18)	1
sitagliptin	benfluorex	Adjusted Treatment Effect	-0.34 (-1.383 to 0.703)	-0.346 (-1.52 to 0.827)	1.000
sitagliptin	metformin	Adjusted Treatment Effect	0.45 (-0.245 to 1.144)	0.447 (-0.376 to 1.268)	1
sitagliptin	miglitol	Adjusted Treatment Effect	0.145 (-0.621 to 0.911)	0.143 (-0.739 to 1.031)	1
sitagliptin	pioglitazone	Adjusted Treatment Effect	0.486 (-0.224 to 1.196)	0.478 (-0.371 to 1.316)	1
sitagliptin	placebo	Adjusted Treatment Effect	-0.57 (-1.157 to 0.017)	-0.57 (-1.265 to 0.123)	1.000
sitagliptin	rosiglitazone	Adjusted Treatment Effect	0.555 (-0.193 to 1.303)	0.535 (-0.377 to 1.41)	1.001
sulfonylurea	acarbose	Adjusted Treatment Effect	0.311 (-0.177 to 0.799)	0.311 (-0.26 to 0.881)	1.001
sulfonylurea	benfluorex	Adjusted Treatment Effect	-0.34 (-1.356 to 0.676)	-0.346 (-1.489 to 0.78)	1.001
sulfonylurea	benfluorex	Interaction	1.306 (-0.039 to 2.651)	1.314 (-0.216 to 2.885)	1.003
sulfonylurea	metformin	Adjusted Treatment Effect	0.45 (-0.026 to 0.925)	0.447 (-0.126 to 1.015)	1.002
sulfonylurea	metformin	Interaction	0.839 (-0.014 to 1.692)	0.835 (-0.23 to 1.854)	1.006
sulfonylurea	miglitol	Adjusted Treatment Effect	0.145 (-0.584 to 0.875)	0.143 (-0.702 to 0.993)	1.002
sulfonylurea	miglitol	Interaction	1.221 (0.026 to 2.416)	1.224 (-0.174 to 2.616)	1.003
sulfonylurea	pioglitazone	Adjusted Treatment Effect	0.486 (-0.115 to 1.088)	0.478 (-0.244 to 1.192)	1.004
sulfonylurea	placebo	Adjusted Treatment Effect	-0.57 (-1.108 to -0.032)	-0.57 (-1.212 to 0.058)	1.004
sulfonylurea	placebo	Interaction	0.526 (-0.319 to 1.371)	0.527 (-0.487 to 1.556)	1.01
sulfonylurea	rosiglitazone	Adjusted Treatment Effect	0.555 (-0.127 to 1.238)	0.535 (-0.294 to 1.332)	1.006
sulfonylurea	rosiglitazone	Interaction	0.645 (-0.264 to 1.554)	0.668 (-0.424 to 1.807)	1.01
sulfonylurea	sitagliptin	Adjusted Treatment Effect	0 (-0.797 to 0.797)	0 (-0.949 to 0.935)	1.001
vildagliptin	acarbose	Adjusted Treatment Effect	0.181 (-0.559 to 0.921)	-33.656 (-111.399 to 44.22)	5.521
vildagliptin	benfluorex	Adjusted Treatment Effect	-0.47 (-1.512 to 0.572)	-34.313 (-112.076 to 43.476)	5.520
vildagliptin	metformin	Adjusted Treatment Effect	0.32 (-0.374 to 1.013)	-33.52 (-111.355 to 44.34)	5.518
vildagliptin	miglitol	Adjusted Treatment Effect	0.015 (-0.75 to 0.78)	-33.824 (-111.486 to 44.016)	5.519
vildagliptin	pioglitazone	Adjusted Treatment Effect	0.356 (-0.353 to 1.065)	-33.489 (-111.268 to 44.422)	5.518
vildagliptin	placebo	Adjusted Treatment Effect	-0.7 (-1.286 to -0.114)	-34.537 (-112.232 to 43.296)	5.519
vildagliptin	rosiglitazone	Adjusted Treatment Effect	0.425 (-0.322 to 1.172)	-33.432 (-111.186 to 44.528)	5.515
vildagliptin	sitagliptin	Adjusted Treatment Effect	-0.13 (-0.96 to 0.7)	-33.967 (-111.675 to 43.905)	5.518
vildagliptin	sulfonylurea	Adjusted Treatment Effect	-0.13 (-0.926 to 0.666)	-33.967 (-111.839 to 43.941)	5.522
acarbose	placebo	Interaction	0 (0 to 0)	-0.161 (-196.706 to 195.206)	1.000
pioglitazone	placebo	Interaction	0 (0 to 0)	-0.571 (-197.697 to 195.554)	1.000
sitagliptin	placebo	Interaction	0 (0 to 0)	0.015 (-194.885 to 196.472)	1
vildagliptin	placebo	Interaction	0 (0 to 0)	33.837 (-44.031 to 111.504)	5.52
benfluorex	acarbose	Interaction	0 (0 to 0)	-0.626 (-196.096 to 196.135)	1.000
metformin	acarbose	Interaction	0 (0 to 0)	-0.147 (-195.55 to 196.499)	1.000
miglitol	acarbose	Interaction	0 (0 to 0)	-0.536 (-195.977 to 196.047)	1.000
pioglitazone	acarbose	Interaction	0 (0 to 0)	-0.41 (-277.979 to 275.592)	1.000
rosiglitazone	acarbose	Interaction	0 (0 to 0)	0.02 (-195.457 to 196.611)	1
sitagliptin	acarbose	Interaction	0 (0 to 0)	0.175 (-274.926 to 278.713)	1
sulfonylurea	acarbose	Interaction	0 (0 to 0)	0.688 (-194.704 to 197.204)	1
vildagliptin	acarbose	Interaction	0 (0 to 0)	33.998 (-183.179 to 250.417)	1.382
pioglitazone	benfluorex	Interaction	0 (0 to 0)	0.216 (-196.786 to 196.282)	1
sitagliptin	benfluorex	Interaction	0 (0 to 0)	0.801 (-194.037 to 197.312)	1
vildagliptin	benfluorex	Interaction	0 (0 to 0)	34.624 (-43.262 to 112.449)	5.52
pioglitazone	metformin	Interaction	0 (0 to 0)	-0.263 (-197.259 to 195.767)	1.000
sitagliptin	metformin	Interaction	0 (0 to 0)	0.322 (-194.44 to 196.873)	1
vildagliptin	metformin	Interaction	0 (0 to 0)	34.145 (-43.755 to 111.935)	5.517
pioglitazone	miglitol	Interaction	0 (0 to 0)	0.125 (-196.986 to 196.301)	1
sitagliptin	miglitol	Interaction	0 (0 to 0)	0.711 (-194.088 to 197.22)	1
vildagliptin	miglitol	Interaction	0 (0 to 0)	34.534 (-43.343 to 112.17)	5.517
rosiglitazone	pioglitazone	Interaction	0 (0 to 0)	0.43 (-195.587 to 197.636)	1
sitagliptin	pioglitazone	Interaction	0 (0 to 0)	0.586 (-274.783 to 278.99)	1
sulfonylurea	pioglitazone	Interaction	0 (0 to 0)	1.098 (-195.088 to 198.142)	1
vildagliptin	pioglitazone	Interaction	0 (0 to 0)	34.408 (-182.75 to 253.021)	1.398
sitagliptin	rosiglitazone	Interaction	0 (0 to 0)	0.156 (-194.69 to 196.678)	1
vildagliptin	rosiglitazone	Interaction	0 (0 to 0)	33.979 (-44.029 to 111.775)	5.515
sulfonylurea	sitagliptin	Interaction	0 (0 to 0)	0.513 (-195.976 to 195.363)	1
vildagliptin	sitagliptin	Interaction	0 (0 to 0)	33.823 (-184.154 to 250.803)	1.388
vildagliptin	sulfonylurea	Interaction	0 (0 to 0)	33.31 (-44.668 to 111.408)	5.527

## Sheet: NMR_common_year
Comparator	Reference	Parameter Type	Estimate (Confidence Interval)	Estimate (Credible Interval)	Rhat	Table of contents
acarbose	placebo	Adjusted Treatment Effect	-0.973 (-1.509 to -0.438)	-0.889 (-1.413 to -0.375)	1.000
acarbose	placebo	Interaction	0.023 (-0.024 to 0.071)	0.022 (-0.03 to 0.072)	1.001
benfluorex	acarbose	Adjusted Treatment Effect	0.035 (-0.69 to 0.759)	0.022 (-0.773 to 0.852)	1
benfluorex	acarbose	Interaction	0 (0 to 0)	0 (0 to 0)
benfluorex	placebo	Adjusted Treatment Effect	-0.939 (-1.614 to -0.263)	-0.868 (-1.532 to -0.166)	1.000
benfluorex	placebo	Interaction	0.023 (-0.024 to 0.071)	0.022 (-0.03 to 0.072)	1.001
metformin	acarbose	Adjusted Treatment Effect	-0.338 (-0.836 to 0.159)	-0.337 (-0.882 to 0.218)	1.000
metformin	acarbose	Interaction	0 (0 to 0)	0 (0 to 0)
metformin	benfluorex	Adjusted Treatment Effect	-0.373 (-0.987 to 0.241)	-0.359 (-1.051 to 0.317)	1.000
metformin	benfluorex	Interaction	0 (0 to 0)	0 (0 to 0)
metformin	placebo	Adjusted Treatment Effect	-1.312 (-1.783 to -0.84)	-1.226 (-1.616 to -0.821)	1.000
metformin	placebo	Interaction	0.023 (-0.024 to 0.071)	0.022 (-0.03 to 0.072)	1.001
miglitol	acarbose	Adjusted Treatment Effect	-0.035 (-0.69 to 0.62)	-0.115 (-0.815 to 0.594)	1.000
miglitol	acarbose	Interaction	0 (0 to 0)	0 (0 to 0)
miglitol	benfluorex	Adjusted Treatment Effect	-0.07 (-0.822 to 0.683)	-0.137 (-0.953 to 0.636)	1.000
miglitol	benfluorex	Interaction	0 (0 to 0)	0 (0 to 0)
miglitol	metformin	Adjusted Treatment Effect	0.303 (-0.28 to 0.887)	0.222 (-0.378 to 0.803)	1
miglitol	metformin	Interaction	0 (0 to 0)	0 (0 to 0)
miglitol	placebo	Adjusted Treatment Effect	-1.008 (-1.462 to -0.554)	-1.004 (-1.505 to -0.507)	1.000
miglitol	placebo	Interaction	0.023 (-0.024 to 0.071)	0.022 (-0.03 to 0.072)	1.001
pioglitazone	acarbose	Adjusted Treatment Effect	-0.342 (-0.946 to 0.261)	-0.306 (-0.965 to 0.359)	1.000
pioglitazone	acarbose	Interaction	0 (0 to 0)	0 (0 to 0)
pioglitazone	benfluorex	Adjusted Treatment Effect	-0.377 (-1.056 to 0.302)	-0.327 (-1.121 to 0.429)	1.000
pioglitazone	benfluorex	Interaction	0 (0 to 0)	0 (0 to 0)
pioglitazone	metformin	Adjusted Treatment Effect	-0.004 (-0.426 to 0.418)	0.031 (-0.457 to 0.512)	1
pioglitazone	metformin	Interaction	0 (0 to 0)	0 (0 to 0)
pioglitazone	miglitol	Adjusted Treatment Effect	-0.307 (-0.962 to 0.347)	-0.191 (-0.855 to 0.481)	1.000
pioglitazone	miglitol	Interaction	0 (0 to 0)	0 (0 to 0)
pioglitazone	placebo	Adjusted Treatment Effect	-1.316 (-1.874 to -0.757)	-1.195 (-1.683 to -0.704)	1.000
pioglitazone	placebo	Interaction	0.023 (-0.024 to 0.071)	0.022 (-0.03 to 0.072)	1.001
rosiglitazone	acarbose	Adjusted Treatment Effect	-0.476 (-0.995 to 0.043)	-0.445 (-0.997 to 0.117)	1.000
rosiglitazone	acarbose	Interaction	0 (0 to 0)	0 (0 to 0)
rosiglitazone	benfluorex	Adjusted Treatment Effect	-0.51 (-1.102 to 0.081)	-0.467 (-1.137 to 0.18)	1.000
rosiglitazone	benfluorex	Interaction	0 (0 to 0)	0 (0 to 0)
rosiglitazone	metformin	Adjusted Treatment Effect	-0.137 (-0.455 to 0.18)	-0.108 (-0.453 to 0.235)	1.000
rosiglitazone	metformin	Interaction	0 (0 to 0)	0 (0 to 0)
rosiglitazone	miglitol	Adjusted Treatment Effect	-0.441 (-1.033 to 0.152)	-0.33 (-0.889 to 0.237)	1.000
rosiglitazone	miglitol	Interaction	0 (0 to 0)	0 (0 to 0)
rosiglitazone	pioglitazone	Adjusted Treatment Effect	-0.133 (-0.557 to 0.291)	-0.139 (-0.617 to 0.34)	1.000
rosiglitazone	pioglitazone	Interaction	0 (0 to 0)	0 (0 to 0)
rosiglitazone	placebo	Adjusted Treatment Effect	-1.449 (-1.948 to -0.95)	-1.334 (-1.69 to -0.975)	1.000
rosiglitazone	placebo	Interaction	0.023 (-0.024 to 0.071)	0.022 (-0.03 to 0.072)	1.001
sitagliptin	acarbose	Adjusted Treatment Effect	0.098 (-0.784 to 0.98)	0.319 (-0.593 to 1.223)	1
sitagliptin	acarbose	Interaction	0 (0 to 0)	0 (0 to 0)
sitagliptin	benfluorex	Adjusted Treatment Effect	0.063 (-0.818 to 0.944)	0.297 (-0.739 to 1.285)	1
sitagliptin	benfluorex	Interaction	0 (0 to 0)	0 (0 to 0)
sitagliptin	metformin	Adjusted Treatment Effect	0.436 (-0.329 to 1.201)	0.656 (-0.197 to 1.494)	1
sitagliptin	metformin	Interaction	0 (0 to 0)	0 (0 to 0)
sitagliptin	miglitol	Adjusted Treatment Effect	0.133 (-0.807 to 1.073)	0.434 (-0.459 to 1.332)	1
sitagliptin	miglitol	Interaction	0 (0 to 0)	0 (0 to 0)
sitagliptin	pioglitazone	Adjusted Treatment Effect	0.44 (-0.376 to 1.257)	0.625 (-0.274 to 1.513)	1
sitagliptin	pioglitazone	Interaction	0 (0 to 0)	0 (0 to 0)
sitagliptin	placebo	Adjusted Treatment Effect	-0.875 (-1.783 to 0.033)	-0.57 (-1.32 to 0.178)	1.000
sitagliptin	placebo	Interaction	0.023 (-0.024 to 0.071)	0.022 (-0.03 to 0.072)	1.001
sitagliptin	rosiglitazone	Adjusted Treatment Effect	0.574 (-0.154 to 1.302)	0.764 (-0.064 to 1.587)	1
sitagliptin	rosiglitazone	Interaction	0 (0 to 0)	0 (0 to 0)
sulfonylurea	acarbose	Adjusted Treatment Effect	0.378 (-0.129 to 0.886)	0.389 (-0.172 to 0.96)	1
sulfonylurea	acarbose	Interaction	0 (0 to 0)	0 (0 to 0)
sulfonylurea	benfluorex	Adjusted Treatment Effect	0.344 (-0.362 to 1.049)	0.367 (-0.439 to 1.148)	1
sulfonylurea	benfluorex	Interaction	0 (0 to 0)	0 (0 to 0)
sulfonylurea	metformin	Adjusted Treatment Effect	0.717 (0.275 to 1.158)	0.726 (0.225 to 1.221)	1
sulfonylurea	metformin	Interaction	0 (0 to 0)	0 (0 to 0)
sulfonylurea	miglitol	Adjusted Treatment Effect	0.413 (-0.261 to 1.087)	0.504 (-0.194 to 1.214)	1
sulfonylurea	miglitol	Interaction	0 (0 to 0)	0 (0 to 0)
sulfonylurea	pioglitazone	Adjusted Treatment Effect	0.721 (0.155 to 1.287)	0.695 (0.055 to 1.34)	1
sulfonylurea	pioglitazone	Interaction	0 (0 to 0)	0 (0 to 0)
sulfonylurea	placebo	Adjusted Treatment Effect	-0.595 (-1.173 to -0.017)	-0.5 (-1.039 to 0.054)	1.000
sulfonylurea	placebo	Interaction	0.023 (-0.024 to 0.071)	0.022 (-0.03 to 0.072)	1.001
sulfonylurea	rosiglitazone	Adjusted Treatment Effect	0.854 (0.403 to 1.305)	0.834 (0.334 to 1.335)	1
sulfonylurea	rosiglitazone	Interaction	0 (0 to 0)	0 (0 to 0)
sulfonylurea	sitagliptin	Adjusted Treatment Effect	0.28 (-0.563 to 1.123)	0.07 (-0.843 to 1.008)	1
sulfonylurea	sitagliptin	Interaction	0 (0 to 0)	0 (0 to 0)
vildagliptin	acarbose	Adjusted Treatment Effect	-0.055 (-0.957 to 0.846)	0.188 (-0.73 to 1.099)	1
vildagliptin	acarbose	Interaction	0 (0 to 0)	0 (0 to 0)
vildagliptin	benfluorex	Adjusted Treatment Effect	-0.09 (-0.983 to 0.803)	0.166 (-0.87 to 1.148)	1
vildagliptin	benfluorex	Interaction	0 (0 to 0)	0 (0 to 0)
vildagliptin	metformin	Adjusted Treatment Effect	0.283 (-0.498 to 1.064)	0.524 (-0.339 to 1.367)	1
vildagliptin	metformin	Interaction	0 (0 to 0)	0 (0 to 0)
vildagliptin	miglitol	Adjusted Treatment Effect	-0.021 (-0.986 to 0.945)	0.302 (-0.606 to 1.2)	1
vildagliptin	miglitol	Interaction	0 (0 to 0)	0 (0 to 0)
vildagliptin	pioglitazone	Adjusted Treatment Effect	0.287 (-0.544 to 1.118)	0.493 (-0.413 to 1.377)	1
vildagliptin	pioglitazone	Interaction	0 (0 to 0)	0 (0 to 0)
vildagliptin	placebo	Adjusted Treatment Effect	-1.029 (-1.969 to -0.088)	-0.702 (-1.454 to 0.042)	1.000
vildagliptin	placebo	Interaction	0.023 (-0.024 to 0.071)	0.022 (-0.03 to 0.072)	1.001
vildagliptin	rosiglitazone	Adjusted Treatment Effect	0.42 (-0.32 to 1.161)	0.632 (-0.203 to 1.457)	1
vildagliptin	rosiglitazone	Interaction	0 (0 to 0)	0 (0 to 0)
vildagliptin	sitagliptin	Adjusted Treatment Effect	-0.153 (-1.091 to 0.784)	-0.131 (-1.19 to 0.929)	1.000
vildagliptin	sitagliptin	Interaction	0 (0 to 0)	0 (0 to 0)
vildagliptin	sulfonylurea	Adjusted Treatment Effect	-0.434 (-1.292 to 0.424)	-0.202 (-1.137 to 0.716)	1.000
vildagliptin	sulfonylurea	Interaction	0 (0 to 0)	0 (0 to 0)

## Sheet: NMR_common_SE
Comparator	Reference	Parameter Type	Estimate (Confidence Interval)	Estimate (Credible Interval)	Rhat	Table of contents
acarbose	placebo	Adjusted Treatment Effect	-1.046 (-1.678 to -0.414)	-1.07 (-1.748 to -0.43)	1.001
acarbose	placebo	Interaction	1.043 (-1.099 to 3.185)	1.681 (-1.218 to 4.661)	1.001
benfluorex	acarbose	Adjusted Treatment Effect	0.092 (-0.634 to 0.817)	0.106 (-0.672 to 0.909)	1
benfluorex	acarbose	Interaction	0 (0 to 0)	0 (0 to 0)
benfluorex	placebo	Adjusted Treatment Effect	-0.955 (-1.666 to -0.244)	-0.964 (-1.687 to -0.238)	1.001
benfluorex	placebo	Interaction	1.043 (-1.099 to 3.185)	1.681 (-1.218 to 4.661)	1.001
metformin	acarbose	Adjusted Treatment Effect	-0.259 (-0.758 to 0.24)	-0.232 (-0.768 to 0.323)	1.000
metformin	acarbose	Interaction	0 (0 to 0)	0 (0 to 0)
metformin	benfluorex	Adjusted Treatment Effect	-0.35 (-0.981 to 0.28)	-0.338 (-1.03 to 0.339)	1.000
metformin	benfluorex	Interaction	0 (0 to 0)	0 (0 to 0)
metformin	placebo	Adjusted Treatment Effect	-1.305 (-1.774 to -0.836)	-1.302 (-1.752 to -0.86)	1.001
metformin	placebo	Interaction	1.043 (-1.099 to 3.185)	1.681 (-1.218 to 4.661)	1.001
miglitol	acarbose	Adjusted Treatment Effect	-0.139 (-0.791 to 0.514)	-0.115 (-0.809 to 0.592)	1.000
miglitol	acarbose	Interaction	0 (0 to 0)	0 (0 to 0)
miglitol	benfluorex	Adjusted Treatment Effect	-0.23 (-0.938 to 0.478)	-0.221 (-0.99 to 0.542)	1.000
miglitol	benfluorex	Interaction	0 (0 to 0)	0 (0 to 0)
miglitol	metformin	Adjusted Treatment Effect	0.12 (-0.428 to 0.668)	0.117 (-0.467 to 0.699)	1
miglitol	metformin	Interaction	0 (0 to 0)	0 (0 to 0)
miglitol	placebo	Adjusted Treatment Effect	-1.185 (-1.842 to -0.528)	-1.185 (-1.831 to -0.56)	1.000
miglitol	placebo	Interaction	1.043 (-1.099 to 3.185)	1.681 (-1.218 to 4.661)	1.001
pioglitazone	acarbose	Adjusted Treatment Effect	-0.238 (-0.852 to 0.375)	-0.23 (-0.892 to 0.453)	1.000
pioglitazone	acarbose	Interaction	0 (0 to 0)	0 (0 to 0)
pioglitazone	benfluorex	Adjusted Treatment Effect	-0.33 (-1.034 to 0.375)	-0.336 (-1.109 to 0.419)	1.000
pioglitazone	benfluorex	Interaction	0 (0 to 0)	0 (0 to 0)
pioglitazone	metformin	Adjusted Treatment Effect	0.02 (-0.413 to 0.454)	0.002 (-0.475 to 0.477)	1
pioglitazone	metformin	Interaction	0 (0 to 0)	0 (0 to 0)
pioglitazone	miglitol	Adjusted Treatment Effect	-0.1 (-0.734 to 0.534)	-0.115 (-0.782 to 0.556)	1.000
pioglitazone	miglitol	Interaction	0 (0 to 0)	0 (0 to 0)
pioglitazone	placebo	Adjusted Treatment Effect	-1.285 (-1.812 to -0.757)	-1.3 (-1.859 to -0.746)	1.001
pioglitazone	placebo	Interaction	1.043 (-1.099 to 3.185)	1.681 (-1.218 to 4.661)	1.001
rosiglitazone	acarbose	Adjusted Treatment Effect	-0.342 (-0.853 to 0.169)	-0.332 (-0.884 to 0.235)	1.000
rosiglitazone	acarbose	Interaction	0 (0 to 0)	0 (0 to 0)
rosiglitazone	benfluorex	Adjusted Treatment Effect	-0.433 (-1.05 to 0.183)	-0.438 (-1.109 to 0.22)	1.000
rosiglitazone	benfluorex	Interaction	0 (0 to 0)	0 (0 to 0)
rosiglitazone	metformin	Adjusted Treatment Effect	-0.083 (-0.403 to 0.237)	-0.1 (-0.447 to 0.242)	1.000
rosiglitazone	metformin	Interaction	0 (0 to 0)	0 (0 to 0)
rosiglitazone	miglitol	Adjusted Treatment Effect	-0.203 (-0.738 to 0.332)	-0.217 (-0.774 to 0.345)	1.000
rosiglitazone	miglitol	Interaction	0 (0 to 0)	0 (0 to 0)
rosiglitazone	pioglitazone	Adjusted Treatment Effect	-0.103 (-0.532 to 0.326)	-0.102 (-0.576 to 0.367)	1.000
rosiglitazone	pioglitazone	Interaction	0 (0 to 0)	0 (0 to 0)
rosiglitazone	placebo	Adjusted Treatment Effect	-1.388 (-1.789 to -0.987)	-1.402 (-1.809 to -1.009)	1.001
rosiglitazone	placebo	Interaction	1.043 (-1.099 to 3.185)	1.681 (-1.218 to 4.661)	1.001
sitagliptin	acarbose	Adjusted Treatment Effect	0.342 (-0.497 to 1.18)	0.345 (-0.558 to 1.269)	1
sitagliptin	acarbose	Interaction	0 (0 to 0)	0 (0 to 0)
sitagliptin	benfluorex	Adjusted Treatment Effect	0.25 (-0.64 to 1.14)	0.239 (-0.733 to 1.198)	1
sitagliptin	benfluorex	Interaction	0 (0 to 0)	0 (0 to 0)
sitagliptin	metformin	Adjusted Treatment Effect	0.6 (-0.144 to 1.345)	0.577 (-0.237 to 1.395)	1
sitagliptin	metformin	Interaction	0 (0 to 0)	0 (0 to 0)
sitagliptin	miglitol	Adjusted Treatment Effect	0.48 (-0.357 to 1.317)	0.46 (-0.435 to 1.358)	1
sitagliptin	miglitol	Interaction	0 (0 to 0)	0 (0 to 0)
sitagliptin	pioglitazone	Adjusted Treatment Effect	0.58 (-0.219 to 1.378)	0.575 (-0.301 to 1.459)	1
sitagliptin	pioglitazone	Interaction	0 (0 to 0)	0 (0 to 0)
sitagliptin	placebo	Adjusted Treatment Effect	-0.705 (-1.436 to 0.027)	-0.725 (-1.528 to 0.063)	1.000
sitagliptin	placebo	Interaction	1.043 (-1.099 to 3.185)	1.681 (-1.218 to 4.661)	1.001
sitagliptin	rosiglitazone	Adjusted Treatment Effect	0.683 (-0.038 to 1.405)	0.677 (-0.116 to 1.467)	1
sitagliptin	rosiglitazone	Interaction	0 (0 to 0)	0 (0 to 0)
sulfonylurea	acarbose	Adjusted Treatment Effect	0.45 (-0.061 to 0.962)	0.462 (-0.092 to 1.033)	1
sulfonylurea	acarbose	Interaction	0 (0 to 0)	0 (0 to 0)
sulfonylurea	benfluorex	Adjusted Treatment Effect	0.359 (-0.364 to 1.082)	0.357 (-0.436 to 1.134)	1
sulfonylurea	benfluorex	Interaction	0 (0 to 0)	0 (0 to 0)
sulfonylurea	metformin	Adjusted Treatment Effect	0.709 (0.259 to 1.16)	0.695 (0.196 to 1.185)	1
sulfonylurea	metformin	Interaction	0 (0 to 0)	0 (0 to 0)
sulfonylurea	miglitol	Adjusted Treatment Effect	0.589 (-0.063 to 1.241)	0.578 (-0.129 to 1.275)	1
sulfonylurea	miglitol	Interaction	0 (0 to 0)	0 (0 to 0)
sulfonylurea	pioglitazone	Adjusted Treatment Effect	0.689 (0.109 to 1.269)	0.692 (0.056 to 1.326)	1
sulfonylurea	pioglitazone	Interaction	0 (0 to 0)	0 (0 to 0)
sulfonylurea	placebo	Adjusted Treatment Effect	-0.596 (-1.185 to -0.006)	-0.608 (-1.23 to -0.008)	1.000
sulfonylurea	placebo	Interaction	1.043 (-1.099 to 3.185)	1.681 (-1.218 to 4.661)	1.001
sulfonylurea	rosiglitazone	Adjusted Treatment Effect	0.792 (0.335 to 1.249)	0.795 (0.292 to 1.294)	1
sulfonylurea	rosiglitazone	Interaction	0 (0 to 0)	0 (0 to 0)
sulfonylurea	sitagliptin	Adjusted Treatment Effect	0.109 (-0.716 to 0.934)	0.118 (-0.789 to 1.022)	1
sulfonylurea	sitagliptin	Interaction	0 (0 to 0)	0 (0 to 0)
vildagliptin	acarbose	Adjusted Treatment Effect	0.213 (-0.624 to 1.051)	0.219 (-0.684 to 1.151)	1
vildagliptin	acarbose	Interaction	0 (0 to 0)	0 (0 to 0)
vildagliptin	benfluorex	Adjusted Treatment Effect	0.122 (-0.768 to 1.011)	0.113 (-0.859 to 1.074)	1
vildagliptin	benfluorex	Interaction	0 (0 to 0)	0 (0 to 0)
vildagliptin	metformin	Adjusted Treatment Effect	0.472 (-0.271 to 1.216)	0.451 (-0.366 to 1.265)	1
vildagliptin	metformin	Interaction	0 (0 to 0)	0 (0 to 0)
vildagliptin	miglitol	Adjusted Treatment Effect	0.352 (-0.485 to 1.189)	0.334 (-0.564 to 1.25)	1
vildagliptin	miglitol	Interaction	0 (0 to 0)	0 (0 to 0)
vildagliptin	pioglitazone	Adjusted Treatment Effect	0.452 (-0.346 to 1.249)	0.449 (-0.437 to 1.339)	1
vildagliptin	pioglitazone	Interaction	0 (0 to 0)	0 (0 to 0)
vildagliptin	placebo	Adjusted Treatment Effect	-0.833 (-1.562 to -0.104)	-0.851 (-1.65 to -0.059)	1.000
vildagliptin	placebo	Interaction	1.043 (-1.099 to 3.185)	1.681 (-1.218 to 4.661)	1.001
vildagliptin	rosiglitazone	Adjusted Treatment Effect	0.555 (-0.165 to 1.276)	0.551 (-0.243 to 1.351)	1
vildagliptin	rosiglitazone	Interaction	0 (0 to 0)	0 (0 to 0)
vildagliptin	sitagliptin	Adjusted Treatment Effect	-0.128 (-1.085 to 0.829)	-0.126 (-1.177 to 0.939)	1.000
vildagliptin	sitagliptin	Interaction	0 (0 to 0)	0 (0 to 0)
vildagliptin	sulfonylurea	Adjusted Treatment Effect	-0.237 (-1.061 to 0.587)	-0.244 (-1.148 to 0.666)	1.000
vildagliptin	sulfonylurea	Interaction	0 (0 to 0)	0 (0 to 0)

## Sheet: NMR_common_sponsorship
Comparator	Reference	Parameter Type	Estimate (Confidence Interval)	Estimate (Credible Interval)	Rhat	Table of contents
acarbose	placebo	Adjusted Treatment Effect	-0.76 (-1.218 to -0.302)	-0.762 (-1.268 to -0.263)	1
acarbose	placebo	Interaction	-0.304 (-0.673 to 0.066)	-0.3 (-0.707 to 0.104)	1
benfluorex	acarbose	Adjusted Treatment Effect	0.215 (-0.487 to 0.917)	0.22 (-0.544 to 0.994)	1
benfluorex	acarbose	Interaction	0 (0 to 0)	0 (0 to 0)
benfluorex	placebo	Adjusted Treatment Effect	-0.545 (-1.12 to 0.031)	-0.542 (-1.165 to 0.089)	1
benfluorex	placebo	Interaction	-0.304 (-0.673 to 0.066)	-0.3 (-0.707 to 0.104)	1
metformin	acarbose	Adjusted Treatment Effect	-0.217 (-0.695 to 0.261)	-0.213 (-0.731 to 0.319)	1
metformin	acarbose	Interaction	0 (0 to 0)	0 (0 to 0)
metformin	benfluorex	Adjusted Treatment Effect	-0.432 (-1.027 to 0.162)	-0.434 (-1.088 to 0.218)	1
metformin	benfluorex	Interaction	0 (0 to 0)	0 (0 to 0)
metformin	placebo	Adjusted Treatment Effect	-0.977 (-1.313 to -0.641)	-0.975 (-1.344 to -0.598)	1
metformin	placebo	Interaction	-0.304 (-0.673 to 0.066)	-0.3 (-0.707 to 0.104)	1
miglitol	acarbose	Adjusted Treatment Effect	-0.087 (-0.704 to 0.53)	-0.087 (-0.758 to 0.589)	1
miglitol	acarbose	Interaction	0 (0 to 0)	0 (0 to 0)
miglitol	benfluorex	Adjusted Treatment Effect	-0.303 (-0.985 to 0.38)	-0.308 (-1.052 to 0.436)	1
miglitol	benfluorex	Interaction	0 (0 to 0)	0 (0 to 0)
miglitol	metformin	Adjusted Treatment Effect	0.13 (-0.382 to 0.642)	0.126 (-0.437 to 0.685)	1
miglitol	metformin	Interaction	0 (0 to 0)	0 (0 to 0)
miglitol	placebo	Adjusted Treatment Effect	-0.847 (-1.289 to -0.405)	-0.85 (-1.33 to -0.365)	1
miglitol	placebo	Interaction	-0.304 (-0.673 to 0.066)	-0.3 (-0.707 to 0.104)	1
pioglitazone	acarbose	Adjusted Treatment Effect	-0.252 (-0.825 to 0.321)	-0.249 (-0.884 to 0.395)	1
pioglitazone	acarbose	Interaction	0 (0 to 0)	0 (0 to 0)
pioglitazone	benfluorex	Adjusted Treatment Effect	-0.467 (-1.128 to 0.194)	-0.469 (-1.198 to 0.255)	1
pioglitazone	benfluorex	Interaction	0 (0 to 0)	0 (0 to 0)
pioglitazone	metformin	Adjusted Treatment Effect	-0.035 (-0.442 to 0.373)	-0.036 (-0.5 to 0.42)	1
pioglitazone	metformin	Interaction	0 (0 to 0)	0 (0 to 0)
pioglitazone	miglitol	Adjusted Treatment Effect	-0.164 (-0.744 to 0.415)	-0.161 (-0.805 to 0.484)	1
pioglitazone	miglitol	Interaction	0 (0 to 0)	0 (0 to 0)
pioglitazone	placebo	Adjusted Treatment Effect	-1.012 (-1.432 to -0.592)	-1.011 (-1.48 to -0.538)	1
pioglitazone	placebo	Interaction	-0.304 (-0.673 to 0.066)	-0.3 (-0.707 to 0.104)	1
rosiglitazone	acarbose	Adjusted Treatment Effect	-0.264 (-0.763 to 0.236)	-0.262 (-0.814 to 0.288)	1
rosiglitazone	acarbose	Interaction	0 (0 to 0)	0 (0 to 0)
rosiglitazone	benfluorex	Adjusted Treatment Effect	-0.479 (-1.049 to 0.091)	-0.483 (-1.117 to 0.138)	1
rosiglitazone	benfluorex	Interaction	0 (0 to 0)	0 (0 to 0)
rosiglitazone	metformin	Adjusted Treatment Effect	-0.046 (-0.354 to 0.261)	-0.049 (-0.397 to 0.286)	1
rosiglitazone	metformin	Interaction	0 (0 to 0)	0 (0 to 0)
rosiglitazone	miglitol	Adjusted Treatment Effect	-0.176 (-0.676 to 0.324)	-0.175 (-0.724 to 0.37)	1
rosiglitazone	miglitol	Interaction	0 (0 to 0)	0 (0 to 0)
rosiglitazone	pioglitazone	Adjusted Treatment Effect	-0.012 (-0.43 to 0.407)	-0.014 (-0.488 to 0.453)	1
rosiglitazone	pioglitazone	Interaction	0 (0 to 0)	0 (0 to 0)
rosiglitazone	placebo	Adjusted Treatment Effect	-1.024 (-1.368 to -0.679)	-1.025 (-1.407 to -0.643)	1
rosiglitazone	placebo	Interaction	-0.304 (-0.673 to 0.066)	-0.3 (-0.707 to 0.104)	1
sitagliptin	acarbose	Adjusted Treatment Effect	0.19 (-0.593 to 0.973)	0.19 (-0.68 to 1.071)	1
sitagliptin	acarbose	Interaction	0 (0 to 0)	0 (0 to 0)
sitagliptin	benfluorex	Adjusted Treatment Effect	-0.025 (-0.882 to 0.832)	-0.03 (-0.985 to 0.91)	1
sitagliptin	benfluorex	Interaction	0 (0 to 0)	0 (0 to 0)
sitagliptin	metformin	Adjusted Treatment Effect	0.407 (-0.311 to 1.126)	0.403 (-0.4 to 1.202)	1
sitagliptin	metformin	Interaction	0 (0 to 0)	0 (0 to 0)
sitagliptin	miglitol	Adjusted Treatment Effect	0.277 (-0.496 to 1.051)	0.277 (-0.582 to 1.131)	1
sitagliptin	miglitol	Interaction	0 (0 to 0)	0 (0 to 0)
sitagliptin	pioglitazone	Adjusted Treatment Effect	0.442 (-0.319 to 1.203)	0.439 (-0.417 to 1.296)	1
sitagliptin	pioglitazone	Interaction	0 (0 to 0)	0 (0 to 0)
sitagliptin	placebo	Adjusted Treatment Effect	-0.57 (-1.205 to 0.065)	-0.572 (-1.287 to 0.136)	1
sitagliptin	placebo	Interaction	-0.304 (-0.673 to 0.066)	-0.3 (-0.707 to 0.104)	1
sitagliptin	rosiglitazone	Adjusted Treatment Effect	0.454 (-0.269 to 1.176)	0.453 (-0.359 to 1.263)	1
sitagliptin	rosiglitazone	Interaction	0 (0 to 0)	0 (0 to 0)
sulfonylurea	acarbose	Adjusted Treatment Effect	0.49 (0.003 to 0.977)	0.493 (-0.043 to 1.037)	1
sulfonylurea	acarbose	Interaction	0 (0 to 0)	0 (0 to 0)
sulfonylurea	benfluorex	Adjusted Treatment Effect	0.275 (-0.406 to 0.956)	0.273 (-0.482 to 1.022)	1
sulfonylurea	benfluorex	Interaction	0 (0 to 0)	0 (0 to 0)
sulfonylurea	metformin	Adjusted Treatment Effect	0.707 (0.284 to 1.131)	0.706 (0.228 to 1.178)	1
sulfonylurea	metformin	Interaction	0 (0 to 0)	0 (0 to 0)
sulfonylurea	miglitol	Adjusted Treatment Effect	0.577 (-0.032 to 1.186)	0.58 (-0.092 to 1.259)	1
sulfonylurea	miglitol	Interaction	0 (0 to 0)	0 (0 to 0)
sulfonylurea	pioglitazone	Adjusted Treatment Effect	0.742 (0.198 to 1.286)	0.742 (0.135 to 1.357)	1
sulfonylurea	pioglitazone	Interaction	0 (0 to 0)	0 (0 to 0)
sulfonylurea	placebo	Adjusted Treatment Effect	-0.27 (-0.74 to 0.2)	-0.269 (-0.79 to 0.257)	1
sulfonylurea	placebo	Interaction	-0.304 (-0.673 to 0.066)	-0.3 (-0.707 to 0.104)	1
sulfonylurea	rosiglitazone	Adjusted Treatment Effect	0.754 (0.32 to 1.187)	0.755 (0.271 to 1.247)	1
sulfonylurea	rosiglitazone	Interaction	0 (0 to 0)	0 (0 to 0)
sulfonylurea	sitagliptin	Adjusted Treatment Effect	0.3 (-0.49 to 1.09)	0.303 (-0.583 to 1.187)	1
sulfonylurea	sitagliptin	Interaction	0 (0 to 0)	0 (0 to 0)
vildagliptin	acarbose	Adjusted Treatment Effect	0.364 (-0.458 to 1.185)	0.36 (-0.559 to 1.273)	1
vildagliptin	acarbose	Interaction	0 (0 to 0)	0 (0 to 0)
vildagliptin	benfluorex	Adjusted Treatment Effect	0.148 (-0.681 to 0.978)	0.14 (-0.796 to 1.054)	1
vildagliptin	benfluorex	Interaction	0 (0 to 0)	0 (0 to 0)
vildagliptin	metformin	Adjusted Treatment Effect	0.581 (-0.135 to 1.297)	0.574 (-0.238 to 1.373)	1
vildagliptin	metformin	Interaction	0 (0 to 0)	0 (0 to 0)
vildagliptin	miglitol	Adjusted Treatment Effect	0.451 (-0.35 to 1.252)	0.448 (-0.447 to 1.331)	1
vildagliptin	miglitol	Interaction	0 (0 to 0)	0 (0 to 0)
vildagliptin	pioglitazone	Adjusted Treatment Effect	0.615 (-0.164 to 1.395)	0.609 (-0.279 to 1.476)	1
vildagliptin	pioglitazone	Interaction	0 (0 to 0)	0 (0 to 0)
vildagliptin	placebo	Adjusted Treatment Effect	-0.396 (-1.13 to 0.337)	-0.402 (-1.225 to 0.421)	1
vildagliptin	placebo	Interaction	-0.304 (-0.673 to 0.066)	-0.3 (-0.707 to 0.104)	1
vildagliptin	rosiglitazone	Adjusted Treatment Effect	0.627 (-0.056 to 1.311)	0.623 (-0.152 to 1.393)	1
vildagliptin	rosiglitazone	Interaction	0 (0 to 0)	0 (0 to 0)
vildagliptin	sitagliptin	Adjusted Treatment Effect	0.174 (-0.796 to 1.144)	0.17 (-0.923 to 1.26)	1
vildagliptin	sitagliptin	Interaction	0 (0 to 0)	0 (0 to 0)
vildagliptin	sulfonylurea	Adjusted Treatment Effect	-0.126 (-0.917 to 0.664)	-0.133 (-1.028 to 0.749)	1
vildagliptin	sulfonylurea	Interaction	0 (0 to 0)	0 (0 to 0)

## Sheet: NMR_CUMIE_year_sponsorship
Comparator	Reference	Parameter Type	Estimate (Confidence Interval)	Estimate (Credible Interval)	Rhat	Table of contents
acarbose	placebo	Adjusted Treatment Effect	-0.836 (-1.308 to -0.364)	-0.873 (-1.377 to -0.368)	1.000
acarbose	placebo	Interaction	0.007 (-0.014 to 0.028)	0.036 (-0.029 to 0.101)	1.003
benfluorex	acarbose	Adjusted Treatment Effect	0.15 (-0.586 to 0.885)	0.14 (-0.626 to 0.928)	1
benfluorex	acarbose	Interaction	0.007 (-0.014 to 0.028)	0.036 (-0.029 to 0.101)	1.003
benfluorex	placebo	Adjusted Treatment Effect	-0.687 (-1.254 to -0.119)	-0.733 (-1.313 to -0.131)	1.000
benfluorex	placebo	Interaction	0.007 (-0.014 to 0.028)	0.036 (-0.029 to 0.101)	1.003
metformin	acarbose	Adjusted Treatment Effect	-0.305 (-0.803 to 0.193)	-0.341 (-0.866 to 0.206)	1.000
metformin	acarbose	Interaction	0.007 (-0.014 to 0.028)	0.036 (-0.029 to 0.101)	1.003
metformin	benfluorex	Adjusted Treatment Effect	-0.454 (-1.105 to 0.196)	-0.481 (-1.172 to 0.2)	1.000
metformin	benfluorex	Interaction	0.007 (-0.014 to 0.028)	0.036 (-0.029 to 0.101)	1.003
metformin	placebo	Adjusted Treatment Effect	-1.141 (-1.439 to -0.843)	-1.214 (-1.558 to -0.855)	1.000
metformin	placebo	Interaction	0.007 (-0.014 to 0.028)	0.036 (-0.029 to 0.101)	1.003
miglitol	acarbose	Adjusted Treatment Effect	-0.112 (-0.761 to 0.536)	-0.119 (-0.804 to 0.578)	1.000
miglitol	acarbose	Interaction	0.007 (-0.014 to 0.028)	0.036 (-0.029 to 0.101)	1.003
miglitol	benfluorex	Adjusted Treatment Effect	-0.262 (-0.982 to 0.459)	-0.259 (-1.025 to 0.485)	1.000
miglitol	benfluorex	Interaction	0.007 (-0.014 to 0.028)	0.036 (-0.029 to 0.101)	1.003
miglitol	metformin	Adjusted Treatment Effect	0.193 (-0.343 to 0.729)	0.222 (-0.357 to 0.794)	1
miglitol	metformin	Interaction	0.007 (-0.014 to 0.028)	0.036 (-0.029 to 0.101)	1.003
miglitol	placebo	Adjusted Treatment Effect	-0.948 (-1.393 to -0.503)	-0.991 (-1.47 to -0.515)	1.000
miglitol	placebo	Interaction	0.007 (-0.014 to 0.028)	0.036 (-0.029 to 0.101)	1.003
pioglitazone	acarbose	Adjusted Treatment Effect	-0.308 (-0.915 to 0.3)	-0.295 (-0.935 to 0.362)	1.000
pioglitazone	acarbose	Interaction	0.007 (-0.014 to 0.028)	0.036 (-0.029 to 0.101)	1.003
pioglitazone	benfluorex	Adjusted Treatment Effect	-0.457 (-1.174 to 0.259)	-0.435 (-1.192 to 0.296)	1.000
pioglitazone	benfluorex	Interaction	0.007 (-0.014 to 0.028)	0.036 (-0.029 to 0.101)	1.003
pioglitazone	metformin	Adjusted Treatment Effect	-0.003 (-0.434 to 0.428)	0.046 (-0.439 to 0.515)	1
pioglitazone	metformin	Interaction	0.007 (-0.014 to 0.028)	0.036 (-0.029 to 0.101)	1.003
pioglitazone	miglitol	Adjusted Treatment Effect	-0.196 (-0.809 to 0.418)	-0.177 (-0.831 to 0.48)	1.000
pioglitazone	miglitol	Interaction	0.007 (-0.014 to 0.028)	0.036 (-0.029 to 0.101)	1.003
pioglitazone	placebo	Adjusted Treatment Effect	-1.144 (-1.566 to -0.722)	-1.168 (-1.626 to -0.705)	1.000
pioglitazone	placebo	Interaction	0.007 (-0.014 to 0.028)	0.036 (-0.029 to 0.101)	1.003
rosiglitazone	acarbose	Adjusted Treatment Effect	-0.359 (-0.868 to 0.151)	-0.384 (-0.912 to 0.15)	1.000
rosiglitazone	acarbose	Interaction	0.007 (-0.014 to 0.028)	0.036 (-0.029 to 0.101)	1.003
rosiglitazone	benfluorex	Adjusted Treatment Effect	-0.508 (-1.11 to 0.093)	-0.524 (-1.186 to 0.11)	1.000
rosiglitazone	benfluorex	Interaction	0.007 (-0.014 to 0.028)	0.036 (-0.029 to 0.101)	1.003
rosiglitazone	metformin	Adjusted Treatment Effect	-0.054 (-0.407 to 0.299)	-0.043 (-0.408 to 0.308)	1.000
rosiglitazone	metformin	Interaction	0.007 (-0.014 to 0.028)	0.036 (-0.029 to 0.101)	1.003
rosiglitazone	miglitol	Adjusted Treatment Effect	-0.247 (-0.767 to 0.274)	-0.266 (-0.809 to 0.272)	1.000
rosiglitazone	miglitol	Interaction	0.007 (-0.014 to 0.028)	0.036 (-0.029 to 0.101)	1.003
rosiglitazone	pioglitazone	Adjusted Treatment Effect	-0.051 (-0.508 to 0.406)	-0.089 (-0.555 to 0.375)	1.000
rosiglitazone	pioglitazone	Interaction	0.007 (-0.014 to 0.028)	0.036 (-0.029 to 0.101)	1.003
rosiglitazone	placebo	Adjusted Treatment Effect	-1.195 (-1.466 to -0.924)	-1.257 (-1.521 to -0.987)	1.000
rosiglitazone	placebo	Interaction	0.007 (-0.014 to 0.028)	0.036 (-0.029 to 0.101)	1.003
sitagliptin	acarbose	Adjusted Treatment Effect	0.177 (-0.696 to 1.049)	0.303 (-0.585 to 1.187)	1
sitagliptin	acarbose	Interaction	0.007 (-0.014 to 0.028)	0.036 (-0.029 to 0.101)	1.003
sitagliptin	benfluorex	Adjusted Treatment Effect	0.027 (-0.937 to 0.992)	0.163 (-0.795 to 1.088)	1
sitagliptin	benfluorex	Interaction	0.007 (-0.014 to 0.028)	0.036 (-0.029 to 0.101)	1.003
sitagliptin	metformin	Adjusted Treatment Effect	0.482 (-0.291 to 1.254)	0.644 (-0.174 to 1.453)	1
sitagliptin	metformin	Interaction	0.007 (-0.014 to 0.028)	0.036 (-0.029 to 0.101)	1.003
sitagliptin	miglitol	Adjusted Treatment Effect	0.289 (-0.566 to 1.143)	0.422 (-0.457 to 1.304)	1
sitagliptin	miglitol	Interaction	0.007 (-0.014 to 0.028)	0.036 (-0.029 to 0.101)	1.003
sitagliptin	pioglitazone	Adjusted Treatment Effect	0.484 (-0.343 to 1.312)	0.598 (-0.268 to 1.461)	1
sitagliptin	pioglitazone	Interaction	0.007 (-0.014 to 0.028)	0.036 (-0.029 to 0.101)	1.003
sitagliptin	placebo	Adjusted Treatment Effect	-0.659 (-1.387 to 0.068)	-0.57 (-1.301 to 0.169)	1.000
sitagliptin	placebo	Interaction	0.007 (-0.014 to 0.028)	0.036 (-0.029 to 0.101)	1.003
sitagliptin	rosiglitazone	Adjusted Treatment Effect	0.535 (-0.28 to 1.351)	0.687 (-0.093 to 1.471)	1
sitagliptin	rosiglitazone	Interaction	0.007 (-0.014 to 0.028)	0.036 (-0.029 to 0.101)	1.003
sulfonylurea	acarbose	Adjusted Treatment Effect	0.37 (-0.163 to 0.904)	0.408 (-0.134 to 0.962)	1
sulfonylurea	acarbose	Interaction	0.007 (-0.014 to 0.028)	0.036 (-0.029 to 0.101)	1.003
sulfonylurea	benfluorex	Adjusted Treatment Effect	0.221 (-0.553 to 0.994)	0.269 (-0.519 to 1.035)	1
sulfonylurea	benfluorex	Interaction	0.007 (-0.014 to 0.028)	0.036 (-0.029 to 0.101)	1.003
sulfonylurea	metformin	Adjusted Treatment Effect	0.675 (0.213 to 1.137)	0.75 (0.253 to 1.24)	1
sulfonylurea	metformin	Interaction	0.007 (-0.014 to 0.028)	0.036 (-0.029 to 0.101)	1.003
sulfonylurea	miglitol	Adjusted Treatment Effect	0.482 (-0.176 to 1.14)	0.527 (-0.153 to 1.217)	1
sulfonylurea	miglitol	Interaction	0.007 (-0.014 to 0.028)	0.036 (-0.029 to 0.101)	1.003
sulfonylurea	pioglitazone	Adjusted Treatment Effect	0.678 (0.092 to 1.264)	0.704 (0.08 to 1.333)	1
sulfonylurea	pioglitazone	Interaction	0.007 (-0.014 to 0.028)	0.036 (-0.029 to 0.101)	1.003
sulfonylurea	placebo	Adjusted Treatment Effect	-0.466 (-0.949 to 0.017)	-0.464 (-0.963 to 0.047)	1.000
sulfonylurea	placebo	Interaction	0.007 (-0.014 to 0.028)	0.036 (-0.029 to 0.101)	1.003
sulfonylurea	rosiglitazone	Adjusted Treatment Effect	0.729 (0.205 to 1.253)	0.793 (0.302 to 1.287)	1
sulfonylurea	rosiglitazone	Interaction	0.007 (-0.014 to 0.028)	0.036 (-0.029 to 0.101)	1.003
sulfonylurea	sitagliptin	Adjusted Treatment Effect	0.193 (-0.634 to 1.021)	0.106 (-0.779 to 0.998)	1
sulfonylurea	sitagliptin	Interaction	0.007 (-0.014 to 0.028)	0.036 (-0.029 to 0.101)	1.003
vildagliptin	acarbose	Adjusted Treatment Effect	0.04 (-0.838 to 0.918)	0.173 (-0.721 to 1.066)	1
vildagliptin	acarbose	Interaction	0.007 (-0.014 to 0.028)	0.036 (-0.029 to 0.101)	1.003
vildagliptin	benfluorex	Adjusted Treatment Effect	-0.11 (-1.082 to 0.863)	0.033 (-0.917 to 0.962)	1
vildagliptin	benfluorex	Interaction	0.007 (-0.014 to 0.028)	0.036 (-0.029 to 0.101)	1.003
vildagliptin	metformin	Adjusted Treatment Effect	0.345 (-0.433 to 1.123)	0.514 (-0.31 to 1.317)	1
vildagliptin	metformin	Interaction	0.007 (-0.014 to 0.028)	0.036 (-0.029 to 0.101)	1.003
vildagliptin	miglitol	Adjusted Treatment Effect	0.152 (-0.708 to 1.012)	0.292 (-0.586 to 1.163)	1
vildagliptin	miglitol	Interaction	0.007 (-0.014 to 0.028)	0.036 (-0.029 to 0.101)	1.003
vildagliptin	pioglitazone	Adjusted Treatment Effect	0.347 (-0.484 to 1.179)	0.469 (-0.399 to 1.332)	1
vildagliptin	pioglitazone	Interaction	0.007 (-0.014 to 0.028)	0.036 (-0.029 to 0.101)	1.003
vildagliptin	placebo	Adjusted Treatment Effect	-0.796 (-1.531 to -0.062)	-0.699 (-1.435 to 0.036)	1.000
vildagliptin	placebo	Interaction	0.007 (-0.014 to 0.028)	0.036 (-0.029 to 0.101)	1.003
vildagliptin	rosiglitazone	Adjusted Treatment Effect	0.398 (-0.426 to 1.223)	0.558 (-0.227 to 1.338)	1
vildagliptin	rosiglitazone	Interaction	0.007 (-0.014 to 0.028)	0.036 (-0.029 to 0.101)	1.003
vildagliptin	sitagliptin	Adjusted Treatment Effect	-0.137 (-1.093 to 0.819)	-0.13 (-1.168 to 0.912)	1.000
vildagliptin	sitagliptin	Interaction	0.007 (-0.014 to 0.028)	0.036 (-0.029 to 0.101)	1.003
vildagliptin	sulfonylurea	Adjusted Treatment Effect	-0.33 (-1.16 to 0.499)	-0.235 (-1.135 to 0.649)	1.000
vildagliptin	sulfonylurea	Interaction	0.007 (-0.014 to 0.028)	0.036 (-0.029 to 0.101)	1.003

## Sheet: NMR_CUMIE_SE_sponsorship
Comparator	Reference	Parameter Type	Estimate (Confidence Interval)	Estimate (Credible Interval)	Rhat	Table of contents
acarbose	placebo	Adjusted Treatment Effect	-0.892 (-1.355 to -0.429)	-0.969 (-1.525 to -0.423)	1.001
acarbose	placebo	Interaction	0.488 (-0.375 to 1.35)	1.362 (-0.963 to 3.681)	1.002
benfluorex	acarbose	Adjusted Treatment Effect	0.135 (-0.565 to 0.835)	0.119 (-0.641 to 0.898)	1
benfluorex	acarbose	Interaction	0.488 (-0.375 to 1.35)	1.362 (-0.963 to 3.681)	1.002
benfluorex	placebo	Adjusted Treatment Effect	-0.757 (-1.286 to -0.227)	-0.85 (-1.454 to -0.221)	1.000
benfluorex	placebo	Interaction	0.488 (-0.375 to 1.35)	1.362 (-0.963 to 3.681)	1.002
metformin	acarbose	Adjusted Treatment Effect	-0.246 (-0.729 to 0.237)	-0.192 (-0.736 to 0.369)	1.000
metformin	acarbose	Interaction	0.488 (-0.375 to 1.35)	1.362 (-0.963 to 3.681)	1.002
metformin	benfluorex	Adjusted Treatment Effect	-0.381 (-0.982 to 0.22)	-0.311 (-0.995 to 0.362)	1.000
metformin	benfluorex	Interaction	0.488 (-0.375 to 1.35)	1.362 (-0.963 to 3.681)	1.002
metformin	placebo	Adjusted Treatment Effect	-1.138 (-1.422 to -0.853)	-1.161 (-1.479 to -0.835)	1.000
metformin	placebo	Interaction	0.488 (-0.375 to 1.35)	1.362 (-0.963 to 3.681)	1.002
miglitol	acarbose	Adjusted Treatment Effect	-0.094 (-0.72 to 0.532)	-0.124 (-0.804 to 0.568)	1.000
miglitol	acarbose	Interaction	0.488 (-0.375 to 1.35)	1.362 (-0.963 to 3.681)	1.002
miglitol	benfluorex	Adjusted Treatment Effect	-0.229 (-0.912 to 0.454)	-0.243 (-1.004 to 0.499)	1.000
miglitol	benfluorex	Interaction	0.488 (-0.375 to 1.35)	1.362 (-0.963 to 3.681)	1.002
miglitol	metformin	Adjusted Treatment Effect	0.152 (-0.366 to 0.67)	0.068 (-0.529 to 0.662)	1
miglitol	metformin	Interaction	0.488 (-0.375 to 1.35)	1.362 (-0.963 to 3.681)	1.002
miglitol	placebo	Adjusted Treatment Effect	-0.986 (-1.421 to -0.551)	-1.093 (-1.619 to -0.557)	1.000
miglitol	placebo	Interaction	0.488 (-0.375 to 1.35)	1.362 (-0.963 to 3.681)	1.002
pioglitazone	acarbose	Adjusted Treatment Effect	-0.24 (-0.827 to 0.347)	-0.208 (-0.86 to 0.463)	1.000
pioglitazone	acarbose	Interaction	0.488 (-0.375 to 1.35)	1.362 (-0.963 to 3.681)	1.002
pioglitazone	benfluorex	Adjusted Treatment Effect	-0.375 (-1.04 to 0.29)	-0.327 (-1.085 to 0.412)	1.000
pioglitazone	benfluorex	Interaction	0.488 (-0.375 to 1.35)	1.362 (-0.963 to 3.681)	1.002
pioglitazone	metformin	Adjusted Treatment Effect	0.006 (-0.406 to 0.419)	-0.016 (-0.48 to 0.447)	1.000
pioglitazone	metformin	Interaction	0.488 (-0.375 to 1.35)	1.362 (-0.963 to 3.681)	1.002
pioglitazone	miglitol	Adjusted Treatment Effect	-0.146 (-0.737 to 0.446)	-0.084 (-0.752 to 0.585)	1.000
pioglitazone	miglitol	Interaction	0.488 (-0.375 to 1.35)	1.362 (-0.963 to 3.681)	1.002
pioglitazone	placebo	Adjusted Treatment Effect	-1.132 (-1.533 to -0.73)	-1.177 (-1.633 to -0.711)	1.000
pioglitazone	placebo	Interaction	0.488 (-0.375 to 1.35)	1.362 (-0.963 to 3.681)	1.002
rosiglitazone	acarbose	Adjusted Treatment Effect	-0.304 (-0.81 to 0.202)	-0.313 (-0.854 to 0.241)	1.001
rosiglitazone	acarbose	Interaction	0.488 (-0.375 to 1.35)	1.362 (-0.963 to 3.681)	1.002
rosiglitazone	benfluorex	Adjusted Treatment Effect	-0.439 (-1.025 to 0.147)	-0.433 (-1.093 to 0.211)	1.000
rosiglitazone	benfluorex	Interaction	0.488 (-0.375 to 1.35)	1.362 (-0.963 to 3.681)	1.002
rosiglitazone	metformin	Adjusted Treatment Effect	-0.058 (-0.373 to 0.257)	-0.122 (-0.464 to 0.218)	1.000
rosiglitazone	metformin	Interaction	0.488 (-0.375 to 1.35)	1.362 (-0.963 to 3.681)	1.002
rosiglitazone	miglitol	Adjusted Treatment Effect	-0.21 (-0.717 to 0.297)	-0.19 (-0.756 to 0.368)	1.000
rosiglitazone	miglitol	Interaction	0.488 (-0.375 to 1.35)	1.362 (-0.963 to 3.681)	1.002
rosiglitazone	pioglitazone	Adjusted Treatment Effect	-0.064 (-0.481 to 0.352)	-0.105 (-0.57 to 0.355)	1.000
rosiglitazone	pioglitazone	Interaction	0.488 (-0.375 to 1.35)	1.362 (-0.963 to 3.681)	1.002
rosiglitazone	placebo	Adjusted Treatment Effect	-1.196 (-1.44 to -0.952)	-1.283 (-1.56 to -1.004)	1.000
rosiglitazone	placebo	Interaction	0.488 (-0.375 to 1.35)	1.362 (-0.963 to 3.681)	1.002
sitagliptin	acarbose	Adjusted Treatment Effect	0.259 (-0.532 to 1.05)	0.275 (-0.614 to 1.171)	1
sitagliptin	acarbose	Interaction	0.488 (-0.375 to 1.35)	1.362 (-0.963 to 3.681)	1.002
sitagliptin	benfluorex	Adjusted Treatment Effect	0.124 (-0.717 to 0.964)	0.156 (-0.787 to 1.077)	1
sitagliptin	benfluorex	Interaction	0.488 (-0.375 to 1.35)	1.362 (-0.963 to 3.681)	1.002
sitagliptin	metformin	Adjusted Treatment Effect	0.505 (-0.209 to 1.218)	0.467 (-0.347 to 1.269)	1
sitagliptin	metformin	Interaction	0.488 (-0.375 to 1.35)	1.362 (-0.963 to 3.681)	1.002
sitagliptin	miglitol	Adjusted Treatment Effect	0.353 (-0.426 to 1.131)	0.399 (-0.48 to 1.264)	1
sitagliptin	miglitol	Interaction	0.488 (-0.375 to 1.35)	1.362 (-0.963 to 3.681)	1.002
sitagliptin	pioglitazone	Adjusted Treatment Effect	0.499 (-0.271 to 1.268)	0.483 (-0.391 to 1.343)	1
sitagliptin	pioglitazone	Interaction	0.488 (-0.375 to 1.35)	1.362 (-0.963 to 3.681)	1.002
sitagliptin	placebo	Adjusted Treatment Effect	-0.633 (-1.29 to 0.024)	-0.694 (-1.456 to 0.067)	1.000
sitagliptin	placebo	Interaction	0.488 (-0.375 to 1.35)	1.362 (-0.963 to 3.681)	1.002
sitagliptin	rosiglitazone	Adjusted Treatment Effect	0.563 (-0.148 to 1.274)	0.589 (-0.203 to 1.374)	1
sitagliptin	rosiglitazone	Interaction	0.488 (-0.375 to 1.35)	1.362 (-0.963 to 3.681)	1.002
sulfonylurea	acarbose	Adjusted Treatment Effect	0.399 (-0.091 to 0.889)	0.369 (-0.177 to 0.928)	1
sulfonylurea	acarbose	Interaction	0.488 (-0.375 to 1.35)	1.362 (-0.963 to 3.681)	1.002
sulfonylurea	benfluorex	Adjusted Treatment Effect	0.264 (-0.433 to 0.961)	0.25 (-0.531 to 1.016)	1
sulfonylurea	benfluorex	Interaction	0.488 (-0.375 to 1.35)	1.362 (-0.963 to 3.681)	1.002
sulfonylurea	metformin	Adjusted Treatment Effect	0.645 (0.199 to 1.092)	0.56 (0.006 to 1.109)	1.001
sulfonylurea	metformin	Interaction	0.488 (-0.375 to 1.35)	1.362 (-0.963 to 3.681)	1.002
sulfonylurea	miglitol	Adjusted Treatment Effect	0.494 (-0.126 to 1.114)	0.492 (-0.198 to 1.184)	1
sulfonylurea	miglitol	Interaction	0.488 (-0.375 to 1.35)	1.362 (-0.963 to 3.681)	1.002
sulfonylurea	pioglitazone	Adjusted Treatment Effect	0.639 (0.072 to 1.206)	0.577 (-0.092 to 1.241)	1.001
sulfonylurea	pioglitazone	Interaction	0.488 (-0.375 to 1.35)	1.362 (-0.963 to 3.681)	1.002
sulfonylurea	placebo	Adjusted Treatment Effect	-0.492 (-0.953 to -0.032)	-0.601 (-1.188 to -0.011)	1.001
sulfonylurea	placebo	Interaction	0.488 (-0.375 to 1.35)	1.362 (-0.963 to 3.681)	1.002
sulfonylurea	rosiglitazone	Adjusted Treatment Effect	0.704 (0.226 to 1.181)	0.682 (0.142 to 1.227)	1.001
sulfonylurea	rosiglitazone	Interaction	0.488 (-0.375 to 1.35)	1.362 (-0.963 to 3.681)	1.002
sulfonylurea	sitagliptin	Adjusted Treatment Effect	0.141 (-0.643 to 0.924)	0.093 (-0.798 to 0.995)	1
sulfonylurea	sitagliptin	Interaction	0.488 (-0.375 to 1.35)	1.362 (-0.963 to 3.681)	1.002
vildagliptin	acarbose	Adjusted Treatment Effect	0.13 (-0.66 to 0.919)	0.145 (-0.732 to 1.036)	1
vildagliptin	acarbose	Interaction	0.488 (-0.375 to 1.35)	1.362 (-0.963 to 3.681)	1.002
vildagliptin	benfluorex	Adjusted Treatment Effect	-0.005 (-0.845 to 0.834)	0.026 (-0.905 to 0.946)	1
vildagliptin	benfluorex	Interaction	0.488 (-0.375 to 1.35)	1.362 (-0.963 to 3.681)	1.002
vildagliptin	metformin	Adjusted Treatment Effect	0.376 (-0.336 to 1.088)	0.337 (-0.471 to 1.141)	1
vildagliptin	metformin	Interaction	0.488 (-0.375 to 1.35)	1.362 (-0.963 to 3.681)	1.002
vildagliptin	miglitol	Adjusted Treatment Effect	0.224 (-0.553 to 1.001)	0.269 (-0.588 to 1.134)	1
vildagliptin	miglitol	Interaction	0.488 (-0.375 to 1.35)	1.362 (-0.963 to 3.681)	1.002
vildagliptin	pioglitazone	Adjusted Treatment Effect	0.37 (-0.398 to 1.137)	0.353 (-0.507 to 1.218)	1
vildagliptin	pioglitazone	Interaction	0.488 (-0.375 to 1.35)	1.362 (-0.963 to 3.681)	1.002
vildagliptin	placebo	Adjusted Treatment Effect	-0.762 (-1.417 to -0.107)	-0.824 (-1.579 to -0.066)	1.000
vildagliptin	placebo	Interaction	0.488 (-0.375 to 1.35)	1.362 (-0.963 to 3.681)	1.002
vildagliptin	rosiglitazone	Adjusted Treatment Effect	0.434 (-0.276 to 1.143)	0.458 (-0.316 to 1.242)	1
vildagliptin	rosiglitazone	Interaction	0.488 (-0.375 to 1.35)	1.362 (-0.963 to 3.681)	1.002
vildagliptin	sitagliptin	Adjusted Treatment Effect	-0.129 (-1.043 to 0.785)	-0.13 (-1.151 to 0.897)	1.000
vildagliptin	sitagliptin	Interaction	0.488 (-0.375 to 1.35)	1.362 (-0.963 to 3.681)	1.002
vildagliptin	sulfonylurea	Adjusted Treatment Effect	-0.27 (-1.052 to 0.513)	-0.224 (-1.106 to 0.661)	1.000
vildagliptin	sulfonylurea	Interaction	0.488 (-0.375 to 1.35)	1.362 (-0.963 to 3.681)	1.002

[truncated: 5 more sheets: NMR_IUMIE_year_sponsorship, NMR_IUMIE_SE_sponsorship, NMR_IUMIE_year, NMR_IUMIE_SE, NMR_IUMIE_sponsorship]
